1 **Title:**

2 Single-nuclei transcriptomes from human adrenal gland reveals distinct cellular identities of low  
3 and high-risk neuroblastoma tumors

4

5 **Authors:**

6 Bedoya-Reina O.C.<sup>1,\*+</sup>, Li W.<sup>1,+</sup>, Arceo M.<sup>1</sup>, Plescher M.<sup>1</sup>, Bullova P.<sup>1</sup>, Pui H.<sup>2</sup>, Kaucka M.<sup>3</sup>,  
7 Kharchenko P.<sup>4,5</sup>, Martinsson T.<sup>6</sup>, Holmberg J.<sup>7</sup>, Adameyko I.<sup>2,8</sup>, Deng Q.<sup>2</sup>, Larsson C.<sup>9</sup>, Juhlin  
8 C.C.<sup>9</sup>, Kogner P.<sup>10</sup>, Schlisio S.<sup>1,\*</sup>

9 1, Department of Microbiology, Tumor and Cell Biology, Karolinska Institutet, Stockholm,  
10 Sweden. 2, Department of Physiology and Pharmacology, Karolinska Institutet, Stockholm,  
11 Sweden. 3, Max Planck Institute for Evolutionary Biology, Plön, Germany. 4, Department of  
12 Biomedical Informatics, Harvard Medical School, Boston, MA, USA. 5, Harvard Stem Cell  
13 Institute, Cambridge, MA, USA. 6, Department of Pathology and Genetics, University of  
14 Gothenburg, Sahlgrenska University Hospital, Gothenburg, Sweden. 7, Department of Cell and  
15 Molecular Biology, Karolinska Institutet, Stockholm, Sweden. 8, Department of  
16 Neuroimmunology, Center for Brain Research, Medical University of Vienna, Vienna, Austria. 9,  
17 Department of Oncology-Pathology, Karolinska Institutet, Stockholm, Sweden. 10, Women's and  
18 Children's Health, Karolinska Institutet, Stockholm, Sweden.

19

20 \*Corresponding authors: Oscar C. Bedoya-Reina, Department of Microbiology, Tumor and Cell  
21 Biology. Karolinska Institutet. Stockholm, Sweden. E-mail: [oscar.bedoya.reina@ki.se](mailto:oscar.bedoya.reina@ki.se). Susanne  
22 Schlisio, Department of Microbiology, Tumor and Cell Biology. Karolinska Institutet. Stockholm,  
23 Sweden. E-mail: [susanne.schlisio@ki.se](mailto:susanne.schlisio@ki.se).

24 +Equally contributing authors

## 25 **Abstract**

26 Childhood neuroblastoma has a remarkable variability in outcome. Age at diagnosis is one of the  
27 most important prognostic factors, with children less than 1 year old having favorable outcomes. We  
28 studied single-cell and single-nuclei transcriptomes of neuroblastoma with different clinical risk  
29 groups and stages, including healthy adrenal gland. We compared tumor cell populations with  
30 embryonic mouse sympatho-adrenal derivatives, and post-natal human adrenal gland. We provide  
31 evidence that low and high-risk neuroblastoma have different cell identities, representing two disease  
32 entities. Low-risk neuroblastoma presents a transcriptome that resembles sympatho- and chromaffin  
33 cells, whereas malignant cells enriched in high-risk neuroblastoma resembles an unknown subtype of  
34 TRKB+ cholinergic progenitor population identified in human post-natal gland. Analyses of these  
35 populations revealed different gene expression programs for worst and better survival in correlation  
36 with age at diagnosis. Our findings reveal two cellular identities and a composition of human  
37 neuroblastoma tumors reflecting clinical heterogeneity and outcome.

38

## 39 **Introduction**

40 Neuroblastoma (NB) is a pediatric cancer arising from the sympathoadrenal cell lineage frequently  
41 originating in the adrenal glands (AG) [1]. This malignancy represents 8-10% of all childhood  
42 cancer cases, and is responsible for 15% of all pediatric oncology deaths worldwide [2]. A clinical  
43 hallmark of neuroblastoma is heterogeneity, featuring outcomes ranging from lethal progression to  
44 spontaneous regression. The risk classification predicting the clinical behavior of the malignancy  
45 and its response to treatment, utilizes the INRGSS criteria (i.e. International Neuroblastoma Risk  
46 Grouping Staging System) [1,3]. One of the most significant and clinically relevant factor for this  
47 risk classification is age. Children younger than 18 months at the time of diagnosis display better  
48 prognosis (i.e. low-risk) than children diagnosed at a later age, and aging is in turn associated a with  
49 poorer outcome (i.e. high-risk) [4,5]. Other prognostic markers are used to assign patients to  
50 specific risk groups, for example ploidy, chromosomal alterations, *MYCN* amplification, and

51 expression of neurotrophin receptors, such as TRKB (encoded by *NTRK2*) associated with high-risk  
52 and poor outcome. In contrast, neurotrophin receptor TRKA expression (encoded by *NTRK1*) is  
53 associated with low-risk and favorable outcome [2]. The reason why the age of the patient at the  
54 time of diagnosis is one of the strongest predictor of risk and outcome is not understood.

55 Previously, it has been reported that the majority of mouse chromaffin cells forming the adrenal  
56 medulla originate from an embryonic neural crest progeny, specifically, from multipotent Schwann  
57 cell precursors (SCPs). SCPs are nerve associated cells that migrate along the visceral motor nerves  
58 to the vicinity of the developing adrenal gland, and form approximately 80% of the chromaffin cells  
59 [6]. The remaining 20% is directly derived from a migratory stream of neural crest cells (NCCs)  
60 that commit to a common sympathoadrenal lineage in proximity to the dorsal aorta [7,8], and is  
61 considered as the source of neuroblastoma [9,10]. SCPs also give rise to paraganglia during mouse  
62 embryonic development, such as chromaffin cells in Zuckerkindl's organ (ZO) and to some  
63 sympathetic neurons [11]. In mouse, the ZO reaches a maximum cell number shortly before birth, in  
64 contrast to human where the peak of cell number is reached around the 3rd year of life, indicating  
65 species-specific developmental differences [12]. However, SCPs are retained for a rather short time  
66 during mouse embryonic development and disappear at around E15 [6]. Thus, it remains unknown  
67 how human chromaffin cells are produced and regenerated after birth and if any distinct population  
68 of cells serves as their progenitor pool.

69 We hypothesize that post-natal chromaffin cells are derived from a different source than their  
70 developmental origin (namely SCPs), and aberrations in this cell source could explain the age-  
71 dependent risk stratification of neuroblastoma. To understand the causes of clinical heterogeneity in  
72 neuroblastoma, we deep-sequenced full-length coverage RNA from single nuclei of tumors ( $n=11$ )  
73 across different risk groups. Further, cell clusters were identified, and their transcriptomes were  
74 cross-compared with those of cell clusters obtained from healthy tissue where the malignancy is  
75 commonly detected, specifically with human ( $n=3$ ) and mouse ( $n=5$ ) post-natal adrenal glands. For  
76 this comparison we also included recently published single-cell sequencing datasets from 10X

77 single-sequenced NB tumors ( $n=8$ ) [13], E12-E13 embryonic mouse adrenal anlagen [6], human  
78 fetal adrenal gland [14], and the transcriptional profiles of neuroblastoma mesenchymal-/NCC-like  
79 and (nor-)adrenergic cell lineages [15,16]. We identified a cluster of TRKB+ cholinergic cells in the  
80 human post-natal adrenal gland, that differ from previously described embryonic Schwann cell  
81 precursors (SCP). This TRKB+ population of cells shared a specific gene signature with a cluster of  
82 undifferentiated cells of mesenchymal nature enriched in high-risk neuroblastomas which was  
83 coupled with lower patient survival probability and older age-at-diagnosis when tested in a larger  
84 cohort of 498 neuroblastoma patients [17]. Conversely, more differentiated noradrenergic cells are  
85 over-represented in low-risk cases, and share specific gene signatures with adrenal human and  
86 mouse transcriptomes that resembles signature of sympatho- and chromaffin cells.

87 All together our results suggest that high-risk neuroblastomas are characterized by a population  
88 of progenitor cells that resemble a cell type in post-natal adrenal gland with migratory and  
89 mesenchymal signatures, while the low-risk neuroblastoma resemble post-natal and developing  
90 chromaffin cells and sympathoblasts.

91

## 92 **Results**

93 To understand why high-risk neuroblastomas arises in children older than 18 months, we first  
94 cataloged normal cell populations in post-natal adrenal gland which is a common location for this  
95 pediatric malignancy. We define the identity of normal cell populations in the adrenal gland of both  
96 post-natal human ( $n=3$ , 1,536 single nuclei) and mouse ( $n=5$ , 1,920 single whole-cells) by single-  
97 nuclei/cell RNA-sequencing (SmartSeq2, see Methods) to an average depth of 485,000- and  
98 669,000 reads per nuclei/cell, respectively (Supplementary Figure 1a-b, Supplementary Table 1).  
99 Technical and biological features of the transcription profile acquired from nuclei (human) or from  
100 whole cells (mouse) are summarized in Supplementary Figure 1c.

101

## 102 **Post-natal human and mouse adrenal glands share cell populations but exhibit differences in** 103 **chromaffin cells**

104 The cell populations in human and mouse adrenal glands were annotated under the expectation  
105 of recovering both adrenal cortex- and medulla-associated cells (Figure 1a for human, 1b for mouse,  
106 Supplementary Table 2). A reference guide of normal adrenal cell populations was generated by  
107 assigning an identity to each cluster, by cross-referencing significantly up-regulated transcripts with  
108 canonical markers curated from the literature (Supplementary Table 2). Adrenal medulla cells were  
109 identified by the expression of a panel of nor- and adrenergic markers, including *PNMT*, *TH*, *DBH*,  
110 *CHGA* and *CHGB* (Figure 1d, Supplementary Table 2). In human, hC4 was identified as the  
111 chromaffin cell cluster (“NOR” panel were significantly up-regulated,  $FDR < 0.01$ , Welch’s *t*-test,  
112 Figure 1a,d), whereas in mouse two chromaffin cell clusters (i.e. mC11 and mC15) were identified  
113 (noradrenergic markers exemplified in “NOR” panel were significantly up-regulated,  $FDR < 0.01$ ,  
114 Welch’s *t*-test, Figure 1b,d, Supplementary Table 2). Nevertheless, the mouse chromaffin  
115 population mC15 shared a more significant specific gene signature with the human chromaffin  
116 cluster hC4 ( $FDR < 0.01$ , Fisher’s exact test, Figure 1c, Supplementary Table 3). To understand the  
117 differences between the two mouse chromaffin populations (mC11 and mC15), we investigated the  
118 expression of genes that differed significantly between them. The expression of *CHGA*, *CHGB*,  
119 *PHOX2A*, and *PHOX2B* were significantly higher in mC15 than in mC11 ( $FDR < 0.01$ , Welch’s *t*-  
120 test), while the expressions of *PNMT* was higher in mC11 than in mC15 ( $FDR < 0.01$ , Welch’s *t*-test,  
121 Figure 1d, Supplementary Table 2). Additionally, mC15 cluster exhibited a significantly higher  
122 expression of a different repertoire of cholinergic muscarinic and nicotinic receptors (mAChR and  
123 nAChR) than mC11 including *CHRM1*, *CHRNA3*, *CHRNA7*, and *CHRNB4* ( $FDR < 0.01$ , Welch’s *t*-  
124 test, Supplementary Figure 2a-b, Supplementary Table 2). In contrast to mouse chromaffin cells,  
125 human postnatal *PNMT*<sup>+</sup> chromaffin cells (cluster hC4) showed a significant expression of the  
126 sympathoblast marker *PRPH* ( $FDR < 0.01$ , Welch’s *t*-test, Figure 2a).

127

## 128 **Identification of a novel population of progenitor cells in the human adrenal gland**

129 Unexpectedly, we found a population of cells unique to the human post-natal adrenal gland  
130 (hC1) which significantly expressed various progenitor and migratory markers, including *SOX6*,  
131 *BCL11A*, *ERBB3*, *NTRK2* (TRKB), *RTTN*, *PTPRZ1*, *TP63*, *ASXL3*, *POU6F2*, *SEMA3E*, *LAMA3*,  
132 *DOCK7* and *CLDN11* ( $FDR < 0.01$ , Welch's *t*-test, "Progenitors" and "Migrat.", highlighted by a  
133 dotted line, Figure 1d and 2a, Supplementary Table S2 and Supplementary Dataset 1). Furthermore,  
134 hC1 progenitor population are of proliferating nature and significantly expressed cell cycling genes  
135 such as *MKI67*, *ASPM*, *BUB1* ("Cell Cycle" panel was significantly up-regulated  $FDR < 0.01$ ,  
136 Welch's *t*-test, Figure 1d and 2a and Supplementary Dataset 1). These progenitors however did not  
137 express previously described multipotent Schwann cell precursors (SCPs) markers such as *SOX10*,  
138 *FOXD3* and *SI00B* (Figure 1d, Supplementary Table 2). In support of this finding, previously  
139 described SCPs from mouse adrenal anlagen at embryonic day E12/E13 [6], and from human fetal  
140 adrenal glands at 8-14 post-conception weeks (PCW) [14] shared no significant specific gene  
141 signature with the human post-natal progenitor cluster hC1 (Fisher's exact test, Supplementary  
142 Figure 2 c-d, Supplementary Table 3). No other progenitor cells than SCP, chromaffin and  
143 sympathoblast populations have been described for fetal adrenal gland [13,14]. In this regard, the  
144 only shared gene signatures with human fetal adrenal gland and mouse embryonic anlagen belonged  
145 to cell-cycle genes expressed in the cycling sympathoblast (mouse E13 and human 8-14 PCW) and  
146 cycling chromaffin (human 8-14 PCW,  $FDR < 0.05$ , Fisher's exact test, Supplementary Table 3). An  
147 estimation of cell velocities (i.e. computational reconstructions of cells trajectory and faiths that  
148 uses transcript splicing to calculate the direction and speed of differentiation) [18,19] suggest that  
149 this type of cells (i.e. hC1) repopulates chromaffin cells in post-natal human adrenal gland (Figure  
150 1e). A velocity-driven gene trajectory analysis using pseudotime indicates that the progenitor cells  
151 transits from precursors cells with high differentiation potential to differentiated chromaffin cells  
152 (Figure 1f-h). Furthermore, both progenitor (hC1) and chromaffin population (hC4), express the

153 nicotinic acetylcholine receptor nAChR $\alpha$ 7 (*CHRNA7*), suggesting that progenitor cells are  
154 cholinergic in nature ( $FDR < 0.01$ , Welch's *t*-test, Supplementary Table 2).

155 To validate the expression and spatial context of the human cholinergic progenitor cells (hC1), a  
156 series of RNA-scope *in situ* hybridizations (ISH) was performed in post-natal adrenal glands from 0  
157 and 4 years old children, and adult (Figure 2b-e, Supplementary Figure 2e, Supplementary Figure  
158 3). We first elucidated the anatomy of the glands in each section for medulla (*TH*), cortex  
159 (*CYP11B2*) and capsule (*RSPO3*) (Supplementary Figure 2e). To identify cells belonging to the hC1  
160 progenitor population, we tested markers identified as significantly up-regulated in hC1 population:  
161 *NTRK2* and *CLDN11* (Figure 2b-d and Supplementary Figure 3a-c). *NTRK2*+*CLDN11*+ double  
162 positive cells were found in human adrenal capsule and medulla exclusive from *TH*+ cells at all  
163 ages, but most abundantly at 0 year of age, suggesting that these cells decline over age. To confirm  
164 that the post-natal progenitor *CLDN11*+ cells are of cholinergic nature, we performed *in situ* RNA-  
165 hybridizations with the cholinergic nicotinic receptor *CHRNA7* (i.e. nAChR  $\alpha$ 7) together with *TH*  
166 and *CLDN11*. Both cell types, *TH*+ chromaffin and *CLDN11*+ progenitor cells, express nAChR  $\alpha$ 7  
167 (Figure 2e). To further confirm that the post-natal progenitor cells in human post-natal gland are  
168 different from the previously described embryonic multipotent SCPs, we performed *in situ* RNA-  
169 hybridizations together with SCP/glia marker *SOX10* (Supplementary Figure 3d-f). *NTRK2*+ cells  
170 were exclusive from *SOX10*+ cells in human post-natal adrenal gland at all ages.

171

## 172 **Different neuroblastoma risk groups present differences in cell population composition**

173 Next we used single-nuclei transcriptomics to characterize eleven neuroblastoma samples across  
174 different clinical risk groups, and genetic subsets (Figure 3a-b, Supplementary Table 1). Deep  
175 frozen samples obtained from surgical resections were used for nuc-Seq (SmartSeq2), yielding a  
176 total of 3,212 high-quality nuclei with an average of 709,676 high-quality reads per nuclei (see  
177 Methods and Supplementary Figure 1). Cluster analysis using PAGODA identified ten cell  
178 populations, classified as: undifferentiated (nC2, and nC3), noradrenergic (NOR clusters nC5, nC7,

179 nC8, nC9), and stroma clusters: mesenchymal stroma (MSC nC1), endothelial (nC4), macrophages  
180 (nC6) and T-cells (nC10) (Figure 3a and Supplementary Dataset 3). The identity of each cluster was  
181 assigned by cross-referencing cluster-defining transcripts with canonical markers curated from the  
182 literature (Supplementary Table 2). Clusters nC2 and nC3 (referred as “undifferentiated”),  
183 presented a significant high expression of progenitor markers *PROM1*, *RITN*, *ERBB3*, *POU6F2*  
184 and the migratory marker *CLDN11*. Remarkably, the undifferentiated nC3 clusters presented a  
185 significantly high expression of *MYCN*, *ALK*, *BRCA1* and *BRCA2* genes and progenitor markers  
186 *BCL11A*, *NTRK2*, *SOX5*, *SOX6*, *TP63*, *LGR5*, *USH2A* ( $FDR < 0.01$ , Welch’s *t*-test, Figure 3c and  
187 Supplementary Table 2, Supplementary Dataset 3). Oppositely, the noradrenergic clusters (NOR,  
188 nC5, nC7, nC8, and nC9) expressed significantly high *NTRK1* (TRKA) and noradrenergic markers  
189 *TH*, *DBH*, *PHOX2A*, *PHOX2B*, and *ISL1* ( $FDR < 0.01$ , Welch’s *t*-test, Figure 3c-d and  
190 Supplementary Table 2, Supplementary Dataset 3).

191 Neuroblastoma samples of different clinical risk groups and stages contained different  
192 contribution of cells within these clusters reflecting the clinical heterogeneity of these clinical  
193 groups. High-risk cases had a significantly higher proportion of cells in stroma and undifferentiated  
194 clusters, whereas the low-risk ones including spontaneous regressing (4S) cases, consisted mostly  
195 of cells belonging to the noradrenergic (NOR) clusters ( $FDR < 0.01$ , Chi-square test, Figure 3b,  
196 Supplementary Figure 4). In agreement with these observations, a deconvolution of 172  
197 neuroblastoma bulk-sequenced samples (NB172 NCI TARGET project) indicated that a  
198 significantly higher proportion of cells in the stroma and undifferentiated nC3 clusters was present  
199 in high-risk patients ( $n=139$ ), and a higher proportion of cells in the noradrenergic clusters nC7,  
200 nC8, and nC9 in low-risk cases ( $n=14$ ,  $FDR < 0.01$ , Chi-square test, Supplementary Figure 4). Some  
201 differences observed between single-nuclei and bulk-seq for nC2 and nC5 clusters could be a  
202 consequence of the clinical heterogeneity within patients of the same risk groups (Supplementary  
203 Figure 4).



204 Mesenchymal markers *PRRX1*, *YAPI*, and *PDGFRA* were significantly expressed in both  
205 clusters, undifferentiated nC3 and MSC nC1 clusters ( $FDR < 0.01$ , Welch's *t*-test, Figure 3c-d and  
206 Supplementary Table 2), in contrast to *PDGFRB* whose up-regulation was significantly higher in  
207 MSC cells (nC1,  $FDR < 0.01$ , Welch's *t*-test, Figure 3c-d and Supplementary Table 2) . Consistently  
208 with this observation, the undifferentiated nC3 cluster shared a significant number of up-regulated  
209 genes with the neural crest cells-like signature (group II) and the mesenchymal (MES) gene  
210 expression signatures previously described in neuroblastoma cell lines [15,16], while the  
211 noradrenergic clusters nC5, nC7, nC8, and nC9 presented a significantly high expression of genes  
212 characterizing the sympathetic noradrenergic (group I) and ADR (adrenergic) signatures  
213 ( $FDR < 0.01$ , Fisher's exact test, Figure 3e-f, Supplementary Table 4). Additionally, specific gene  
214 signatures from each neuroblastoma cluster was compared with the recently described markers of  
215 six cell-clusters in eight GOSH-cohort tumors sequenced with 10X [13]. The noradrenergic clusters  
216 nC5, nC7, nC8, and nC9 resembled more significantly the GOSH sympathoblast-like tumors  
217 clusters 1, 2, and 3, whereas the undifferentiated cluster nC3 showed a higher significant  
218 resemblance with the less differentiated GOSH-tumor cluster 3 ( $FDR < 0.01$ , Fisher's exact test,  
219 Figure 3g, Supplementary Table 4).

220 To differentiate malignant- from stroma cell clusters, an analysis of the genome rearrangements  
221 was conducted, and further experimentally validated. Significant copy number changes were  
222 computed for each sample using as background the changes observed in immune cells (i.e. T-cells  
223 nC10 and macrophages nC6, only in the 7 samples with immune cells as detailed in Methods). For  
224 the majority of samples, a significantly higher number of cells presented gains in 17q, losses in 1p  
225 or in 11q, in the undifferentiated nC3 cluster (K87, K10, 23, K55, and K3). Fewer samples  
226 presented a remarkable number of cells with rearrangements in the MSC nC1 (K87),  
227 undifferentiated nC2 (23, K3, K6, and K87), and NOR nC5 clusters (K6 and K87,  $FDR < 0.05$ ,  
228 Fisher's exact test, Figure 3h). 1p deletion was confirmed by microarrays for samples 23, K10, and

229 K55, 11q loss for samples 23 and K87, and 17q gains for samples K10, K3, and K87. Cells with  
230 predicted significant gains and losses from these samples are illustrated in Figure 3i.

231 Next, we validated the expression of significantly enriched markers identified in neuroblastoma  
232 clusters (Figure 4, Supplementary Figure 5). RNA-scope *in situ* hybridizations in a *MYCN*  
233 amplified neuroblastoma case (K10, Supplementary Table 1) as independently confirmed by  
234 comparative genomic hybridization (CGH) [20], revealed a high intratumoral heterogeneity for *TH*,  
235 *MYCN* and *ALK* expression, with tumor regions with intense staining of *MYCN* and *ALK*, negative  
236 for *TH* (Figure 4a, zoom 2). Other tumor regions revealed some diffuse stainings of few *TH*<sup>+</sup>  
237 positive cells with enlarged nuclei positive for *MYCN*, but negative for *ALK* (Figure 4a, zoom 1),  
238 whereas other regions did not exhibited expression of *TH*, *MYCN* and *ALK* (zoom 4). Interestingly,  
239 *in situ* hybridizations for *NTRK1* and *NTRK2* (encoding TRKA and TRKB, respectively) revealed  
240 that the identified *TH*<sup>+</sup> cells with enlarged nuclei are *NTRK1*<sup>+</sup> but *NTRK2*<sup>-</sup>, in contrast to all  
241 surrounding *NTRK1*<sup>-</sup> *NTRK2*<sup>+</sup> cells with small nuclei (Figure 4b). It is possible that the identified  
242 *TH*<sup>+</sup> cells with enlarged nuclei (*TH*<sup>+</sup>, *MYCN*<sup>+</sup>, *NTRK1*<sup>+</sup>, *NTRK2*<sup>-</sup>, *ALK*<sup>-</sup>) might account for cells  
243 undergoing differentiation [21]. Expression of neurotrophin receptor *NTRK1* is characterized as a  
244 marker for favorable outcome and low-risk, while *NTRK2* expression is associated with poor  
245 outcome and high-risk [2]. In agreement with these findings, cells for the favorable low-risk  
246 neuroblastoma case (K6, stage 4S, Supplementary Table 1) were homogeneously *NTRK1*<sup>+</sup>, *TH*<sup>+</sup>,  
247 *NTRK2*<sup>-</sup> (Supplementary Figure 5a).

248 In addition, we validated the expression of the mesenchymal marker *PDGFRA* that was  
249 identified to be significantly highly expressed in high-risk neuroblastoma cluster (nC3). *PDGFRA*  
250 expression in the high-risk *MYCN* amplified case (i.e. K10) was observed in both *NTRK2*<sup>+</sup>, (Figure  
251 4c zoom 2), and also in *CLDN11*<sup>+</sup> cells (Figure 4d, zoom 2, 3, and 4), whereas in *LGR5*<sup>+</sup> cells  
252 showed no *PDGFRA* signal (Figure 4c zoom 1 and Figure 4d zoom 1). In contrast, the low-risk  
253 stage 4S case was entirely negative for *PDGFRA* and *PRRX1* expression, however homogeneously  
254 expressed in all cells noradrenergic markers *DBH* and *PHOX2B* (Supplementary Figure 5b,c). Stage

255 2B neuroblastoma was more heterogeneous in *DBH* and *PHOX2B* expression (Supplementary  
256 Figure 5d), with all cells lacking expression of *PRRX1* and very few cells positive for *PDGFRA*  
257 (Supplementary Figure 5e).

258

259 **A cell population enriched in high-risk neuroblastoma resembles the human post-natal**  
260 **adrenal progenitor population**

261 High-risk neuroblastoma commonly arises in children older than 18 months and frequently  
262 originates in the adrenal glands [1]. To understand how the observed neuroblastoma populations of  
263 high and low-risk cases are related to normal post-natal and embryonic adrenal tissue, we  
264 performed a comparative analysis of their transcriptional profiles (Figures 5, 6 and 7). Significant  
265 expression of (nor-)adrenergic (“NOR”) markers (i.e. *CHGA*, *CHGB*, *DBH*, *TH*, *PHOX2A* and  
266 *PHOX2B*) is common for healthy sympatho-adrenal cells and tumor NOR populations identified in  
267 low-risk neuroblastoma cases ( $FDR < 0.01$ , Welch’s *t*-test, Figure 5a, Supplementary Table 3). In  
268 agreement with this observation, specific gene signatures from neuroblastoma NOR clusters were  
269 found to be significantly shared with both, mouse embryonic (E12-E13) and human (8-14 PCW)  
270 chromaffin and sympathoblast clusters, and also with human and mouse post-natal chromaffin  
271 clusters ( $FDR < 0.01$ , Fisher’s exact test, Figure 5b-e, Supplementary Table 5, Supplementary Figure  
272 6a). A more significant resemblance was observed between the NOR nC7 and nC9 clusters with  
273 fetal (8-14 PCW) sympathoblast cells, while the NOR nC8 cluster presented a closer similitude to  
274 fetal (8-14 PCW) chromaffin and sympathoblast clusters (Figure 5e, Supplementary Table 5). A  
275 comparative analysis with the mouse embryonic transcriptional profiles showed similar significance  
276 of gene signatures shared between NOR nC7, and nC9 clusters with both, mouse embryonic  
277 chromaffin and sympathoblast populations ( $FDR < 0.01$ , Fisher’s exact test, Figure 5b,c,  
278 Supplementary Figure 6a, Supplementary Table 5). In support of these findings, neuroblastoma  
279 NOR clusters presented a high signature score (measuring transcriptional resemblance, see  
280 Methods) for bridge, sympathoblast and chromaffin cells from in mouse and human developing

281 adrenal glands, and for human post-natal chromaffin cells (Figure 6a-c). Furthermore, the  
282 significant specific gene signatures of NOR nC7 and nC8 clusters was significantly associated with  
283 a better outcome in a large neuroblastoma cohort (i.e. Bonferroni corrected  $p$ -value  $< 0.01$ , 498  
284 cases in SEQC [17], see Methods, Figure 6d).

285 In contrast to the neuroblastoma NOR cells, the undifferentiated neuroblastoma clusters (nC3,  
286 nC2) did not share specific gene signatures with mouse embryonic and post-natal sympathoblast nor  
287 chromaffin populations (Figure 5b-e). The nC3 cluster however shared a marginally significant  
288 number of specific-signature genes with cycling populations in the human fetal gland (i.e. cycling  
289 sympathoblast and chromaffin,  $FDR < 0.05$ , Fisher's exact test, Figure 5e). These were nonetheless  
290 only cell-cycle related genes (i.e. *ASPM*, *BUB1*, *CENPE*, *CLSPN*, and *ESCO2*, Supplementary  
291 Table 5).

292 Importantly, and in contrast to the fetal adrenal gland comparison, the neuroblastoma nC3  
293 cluster shared a specific gene signature with the human cholinergic progenitor population (hC1)  
294 identified in post-natal human adrenal gland ( $FDR < 0.01$ , Fisher's exact test, Figure 5d,  
295 Supplementary Table 5). Additionally, nC3 and hC1 shared a significantly high expression  
296 ( $FDR < 0.01$ , Welch's  $t$ -test) of *NTRK2*, mesenchymal (i.e. *COL1A2*, *COL6A3*, *COL12A1*),  
297 migratory (i.e. *CLDN11*, *DOCK7*), and progenitor genes (i.e. *BCL11A*, *ERBB3*, *RTTN*, *TP63*,  
298 *ASXL3*, *POU6F2* and *SOX6*, Supplementary Table 2, Supplementary Datasets 1 and 3).  
299 Furthermore, the undifferentiated neuroblastoma cluster (nC3) constituted a larger proportion of  
300 cells in high-risk samples in both the 11 nuc-Seq-samples and in a deconvolved cohort of 172  
301 patients ( $FDR < 0.01$ , Chi-square test, Supplementary Figure 4), and its specific-signature genes have  
302 a marginally higher expression average in patients with a lower survival probability in a larger  
303 cohort (i.e. Bonferroni corrected  $p$ -value  $< 0.05$ , 498 cases in SEQC [17], see Methods, Figure 6d).

304 Recently, embryonic multipotent schwann cell precursors (SCP) have been suggested to be a  
305 potential source of neuroblastoma origin [6]. However, human fetal and mouse embryonic SCPs  
306 shared only specific gene signatures with neuroblastoma stroma clusters MSC nC1 and endothelial

307 nC4. (Figure 5c-d, Supplementary Figure 6a, Supplementary Table 5). A detailed look into their  
308 shared gene signatures suggest a high expression of genes related to cell adhesion and motility (i.e.  
309 GO term,  $FDR < 0.05$ , Fisher's exact test) and did not include SCP lineage markers (i.e. *SOX10*,  
310 *SI00B*, *FABP7* or *PLP1*, Supplementary Table 5).

311 We further analyzed in detail how the transcriptional profiles of the different neuroblastoma  
312 clusters were associated with the survival and age at diagnosis in a larger cohort (i.e. 498 cases in  
313 SEQC [17], Figure 6e-h, Supplementary Table 6). We compared the specific gene signatures from  
314 each neuroblastoma cluster with genes in 498 patient samples with 1) differential expression by risk  
315 groups (Figure 6e), 2) significant correlation with age-at-diagnosis (Figure 6f,) and 3) differential  
316 expression by survival outcome (Figure 6g as detail in Methods) . Genes in the specific signatures  
317 from endothelial nC4, macrophages nC6, undifferentiated nC3, and NOR clusters (nC7, nC8, and  
318 nC9) were significantly enriched in both low/intermediate risks and better survival cases  
319 ( $FDR < 0.01$ , Fisher's exact test, Figure 6e-g, Supplementary Table 6). Nevertheless, genes in the  
320 specific signatures from undifferentiated nC3 and NOR nC9 clusters were also significantly  
321 enriched in both high-risk and worst survival patients ( $FDR < 0.01$ , Fisher's exact test, Figure 6e-g,  
322 Supplementary Table 6). Remarkably, a more significant directly correlation was observed for the  
323 specific gene signature of the undifferentiated nC3 cluster with age at diagnosis (i.e. they are more  
324 likely to be expressed in later ages), while a more significant inversely correlation was found for the  
325 NOR nC9 cluster ( $FDR < 0.01$ , Fisher's exact test, Figure 6f, Supplementary Table 6).

326 A detailed analysis of the specific gene signatures for the undifferentiated nC3 and NOR nC9  
327 clusters revealed that the two cell populations feature different gene programs that can be either 1)  
328 directly correlated with age at diagnosis and associated with poor survival (more significant in nC3  
329 than in nC9), or otherwise 2) inversely correlated with age at diagnosis and resulting in better  
330 survival (more significant in nC9 than in nC3,  $FDR < 0.01$ , Fisher's exact test, Figure 6h,  
331 Supplementary Table 6). The genes inversely correlated with age at diagnosis, and also those  
332 resulting in better survival, are significantly associated with cell adhesion and differentiation for

333 both nC3 and nC9 clusters (GO term,  $FDR < 0.01$ , Fisher's exact test, Supplementary Figure 6d-g,  
334 Supplementary Table 7). Oppositely, genes in NOR nC9 associated with a later age at diagnosis and  
335 a worst survival are significantly enriched in translation, RNA processing and splicing, while genes  
336 in the undifferentiated nC3 cluster associated with a worst survival are enriched in DNA damage  
337 and repair and cell cycle, and those associate with a later age of diagnosis are enriched in cell  
338 motility (GO term  $FDR < 0.01$ , Fisher's exact test, Supplementary Figure 6d-g, Supplementary Table  
339 7).

340

341 We further investigated the commonalities of human post-natal adrenal gland and  
342 neuroblastoma clusters, and performed a comparative analysis based on the detection of matching  
343 mutual nearest neighbors [22,23] (Figure 7a-b). We used human adrenal gland for the projection of  
344 cell states onto neuroblastoma data (i.e. query). In agreement with the identified significant shared  
345 gene signatures (shown in Figure 5b), human post-natal chromaffin (hC4) population matched to  
346 the malignant NOR clusters (nC5, nC7, nC8, and nC9), whereas the adrenal gland progenitor  
347 population (hC1) matched the malignant undifferentiated neuroblastoma clusters nC2 and nC3  
348 (Figure 6a-b). Populations of endothelial, macrophages and mesenchymal cells (i.e. stroma cells) in  
349 neuroblastoma have a large number of cells with a high state probability of (i.e. best transcriptional  
350 match using joined labeling) to similar populations in human adrenal gland.

351 Additionally, we interrogated the relationships between embryonic mouse adrenal anlagen,  
352 neuroblastoma and healthy human post-natal adrenal cell populations. We performed an Euclidean  
353 distance-based analysis of the transcriptional similarities between all populations, excluding cortex  
354 and immune cells (Figure 7c-d). This analysis suggested that these populations could be clustered  
355 into four groups, namely 1) (nor-)adrenergic, 2) undifferentiated, 3) mesenchymal, and 4)  
356 endothelial cells (Figure 7c). Consistently with the identified significant shared gene signatures  
357 (shown in Figure 5b-d), a statistical analysis of these Euclidean distances (Figure 7d) indicated that  
358 1) SCPs, glial, endothelial and mesenchymal cells from human and mouse adult and embryonic

359 E12-E13 populations share a similar transcriptional profile; 2) human adrenal progenitor cluster  
360 hC1 resemble that of the neuroblastoma undifferentiated populations nC2 and nC3; and 3)  
361 chromaffin cells from human and mouse (post-natal and embryonic) have a similar transcriptional  
362 profile, that resemble the neuroblastoma noradrenergic clusters nC5, nC7, nC8 and nC9.

363

## 364 **Discussion**

365 With the aim of understanding the transcriptional basis of the clinical heterogeneity in  
366 neuroblastoma, we analyzed 3,212 high-quality single cell/nuclei from eleven tumors from patients  
367 across different risk groups. We sequenced to an average of approximately 710,000 reads per  
368 nuclei/cell, and compared them to 3,456 human and mouse developing and post-natal AG cells  
369 sequenced to similar depths. While a larger number of cells could provide a more comprehensive  
370 view of the different cell types within the tumors, the large sequencing depth combined with full-  
371 length coverage offers higher sensitivity. A recent study compared the results obtained with Smart-  
372 Seq2 and 10X Genomics (10X) and concluded that the detection sensitivity was higher in Smart-  
373 seq2 than 10X. In particular, the gene capture rate of 20 cells sequenced with Smart-Seq2 is  
374 comparable to that of 1,000 cells with 10X [24]. Taking advantage of the enhanced sensitivity  
375 offered by Smart-Seq2, we consistently recovered the same populations of cells in neuroblastoma  
376 tumors of the same risk groups, and compared them with post-natal and developing mouse and  
377 human adrenal glands.

378 The way chromaffin cells are repopulated in the post-natal adrenal gland remains unknown.  
379 While during mouse embryonic development, multipotent Schwann cell precursors (i.e. SCPs)  
380 [6,11] and sympathoadrenal progenitors [7] can give rise to both chromaffin cells and  
381 sympathoblasts, their post-natal existence has not been demonstrated. In this study, we identified a  
382 population of cells unique to post-natal human adrenal gland that presented precursor features of  
383 chromaffin cells, namely 1) the expression of progenitor and migratory markers (i.e. *NTRK2*,  
384 *ERBB3*, *BCL11A*, *ASXL3*, *RTTN*, *SOX6*, *DOCK7*, *LAMA3*, *SEMA3E* and *CLDN11*), 2) a high

385 differentiation potential, and 3) a computed (by RNA velocity) directionality of the *in vivo*  
386 transitions from progenitor to chromaffin cells. Both human progenitor and chromaffin cells express  
387 the cholinergic receptor nAChRs  $\alpha 7$  (encoded by the nicotinic acetylcholine receptor gene  
388 *CHRNA7*), suggesting that progenitor cells are of cholinergic nature. nAChR $\alpha 7$  is a critical  
389 component for the cholinergic system mediating ligand-gated ion channel activation of calcium  
390 dependent signaling pathways [25], and is involved in the response to cortisol and oxidative stress  
391 [26,27]. As this post-natal progenitor population of chromaffin cells does not express the SCP  
392 markers *SOX10*, *S100B*, nor *FOXD3* and is not present in the mouse adrenal gland, it is possible  
393 that it is unique to humans. RNA *ISH* for markers characteristic of this progenitor population at  
394 different ages in human post-natal adrenal glands validated their existence and suggested that this  
395 population declines with age.

396 Comparative analysis of the transcriptional profiles of post-natal human adrenal glands and  
397 neuroblastoma tumors of different clinical risk groups revealed that the identified post-natal  
398 cholinergic progenitor population (hC1) had a remarkable transcriptional resemblance to the  
399 undifferentiated cluster (nC3) characteristic of high-risk neuroblastoma. Both populations, high-risk  
400 undifferentiated cluster (nC3) and progenitor population in post-natal gland (hC1) shared a  
401 significantly high expression of neurotrophic receptor *NTRK2* (encoding TRKB), mesenchymal (i.e.  
402 *COL1A2*, *COL6A3*, *COL12A1*), migratory (i.e. *LAMA3*, *CLDN11*, *DOCK7*), and progenitor genes  
403 (i.e. *BCL11A*, *ERBB3*, *RTTN*, *TP63*, *ASXL3*, *POU6F2* and *SOX6*). In contrast, the transcriptional  
404 profile of the clusters identified in low-risk neuroblastoma did not resemble the human progenitor  
405 population identified in post-natal gland, instead they showed a noradrenergic (NOR)  
406 transcriptional signature (i.e. *NTRK1*, *CHGA*, *CHGB*, *DBH*, *TH* and *PHOX2B*) matching the  
407 transcriptome of human and mouse post-natal chromaffin cells, as well as fetal human (8-14 PCW)  
408 and mouse embryonic (E13) sympathoblast and chromaffin populations.

409 Furthermore, our results indicate that the high-risk-associated cell cluster (nC3) has a  
410 transcriptional program that changes with age-at-diagnosis and is correlated with lower survival



411 probabilities of patients. This program favors the expression of genes associated with cell motility  
412 and metastasis in older patients and with replication stress (i.e. DNA repair and cell cycle) in worst  
413 outcome cases. Oppositely, the low-risk-enriched NOR cell clusters presented transcriptional  
414 programs associated with greater survival probabilities and younger ages at diagnosis. Within these  
415 clusters, the NOR nC9 was an exception as it also showed a transcriptional program that presented a  
416 worst outcome in correlation with age. Remarkably, this program is associated with RNA-  
417 (mis-)splicing and not with replication stress. Our results suggest that at a younger age (at time of  
418 diagnosis) the expression of cell adhesion and differentiation genes from NOR- (and to less extent  
419 undifferentiated-) cells signals a better survival probability. Oppositely, a higher expression in older  
420 patients of RNA splicing genes from NOR cells, and to a larger extent of replication-stress genes in  
421 undifferentiated cells is likely to signal a worst outcome.

422 In this regard, low-risk neuroblastoma is common in younger children with less than 18 months  
423 of age at the time of diagnosis [1,5] and *NTRK1* expression (encoding TRKA) is a strong prognostic  
424 histological marker for favorable cases, whereas TRKB (encoded by *NTRK2*) is associated with  
425 poor outcome [2]. One possibility is that different progenitor populations source neuroblastomas at  
426 different ages, thereby accounting for the remarkable clinical heterogeneity that is coupled with age.  
427 Thus, age-at-diagnosis is a strong outcome predictor. Specifically, favorable neuroblastomas might  
428 originate from embryonic developmental errors when SCPs differentiate to chromaffin and  
429 neuroblast, whereas unfavorable neuroblastomas would arise from errors during post-natal  
430 development when TRKB+ cholinergic progenitors repopulate chromaffin cells post-natally.

431

## 432 **Acknowledgements**

433 The single-cell transcriptome data was generated at the Eukaryotic Single-cell Genomics facility  
434 at Science for Life Laboratory in Stockholm, Sweden. The computations and data handling for this  
435 project were performed on resources provided by the Swedish National Infrastructure for  
436 Computing (SNIC) at sllstore2017016, sens2018122, SNIC 2019/35-3, SNIC 2019/3-462, SNIC

437 2020/5-457, SNIC 2020/6-171, and SNIC 2020/6-172, partially funded by the Swedish Research  
438 Council through grant agreements no. 2016-07213 and 2018-05973. We thank Lotta Elfman and PJ  
439 Svensson for help in providing neuroblastoma samples. We thank the NIH NeuroBioBank  
440 providing human adrenal glands. We thank Marie Arsenian-Henriksson and also members of the  
441 Schlisio and Holmberg groups for insightful comments on this research. We also thank Yao Shi for  
442 his support with the analysis of the 498 NB SEQC cohort. Funding: S.S. was funded by the Swedish  
443 Research Council, Swedish Childhood Cancer Fund, the Swedish Cancer Society, Knut and Alice  
444 Wallenberg Foundation, ParaDiff foundation and ERC Synergy grant (KILL-OR-  
445 DIFFERENTIAT). P.Ko. was funded by the Swedish Research Council, the Swedish Childhood  
446 Cancer Fund, and the Swedish Foundation for Strategic Research. I.A. was supported by ERC  
447 Consolidator grant (STEMMING-FROM-NERVE), Swedish Research Council, Paradifference  
448 Foundation, Bertil Hallsten Research Foundation, Cancer Foundation in Sweden, Knut and Alice  
449 Wallenberg Foundation. P.V.K. was founded by the NSF-14-532-CAREER grant.

450

451 Author contributions: Conceptualization, S.S.; Investigation, O.C.B.-R., W.L., M.A., M.P., J.H.,  
452 I.A., M.K. and S.S.; Validation, O.C.B.-R., W.L., M.A., M.P., S.S. Computational investigation and  
453 analysis, O.C.B.-R. and M.A.; Sample collection and characterization, C.L., C.C.J., T.M., P.Ko.,  
454 M.K.; Writing O.C.B.-R. and S.S. Funding Acquisition, Resources & Supervision, O.C.B.-R. and  
455 S.S. Competing interests: none.

456

457 **Methodology:**

458

459 **Sample collection and single cell/nuclei sequencing**

460 Eleven neuroblastoma samples were collected from patients at different ages (0-79 months at  
461 diagnosis) and their INSS stages determined following Shimada's criteria. In particular, three  
462 samples were classified as favorable INSS stages (one stage 1, two stage 2/2B), two as favorable

463 widespread stage (4S) and six in intermediate/high metastatic stages (two stage 3, and four stage 4)  
464 [4]. According to the INRG clinical and biological criteria five patients were classified as high-risk,  
465 one as intermediate risk and five as low-risk, and treated accordingly to local and international  
466 protocols [3]. Tumors were genotyped according to [20], five high-risk genotype *MYCN*-amplified  
467 and/or 11q-deleted, and six low-risk genotype Numerical Only or Other Structural (Supplementary  
468 Table 1). In addition, three human and five mouse adrenal glands were obtained. All human adrenal  
469 samples were collected in conjunction to disease unrelated to pheochromocytoma, paraganglioma  
470 and neuroblastoma. Further details about these samples are included in Supplementary Table 1.

471 Human samples were collected following surgical resection at the Karolinska University  
472 Hospital under the ethical permits from Stockholm Regional Ethical Review Board and the  
473 Karolinska University Hospital Research Ethics Committee (2009/1369-31/1 and 03-736) and KI  
474 2007/069 and KI 2001/136 , issued to Professor Per Kogner and Dr. C. Christofer Juhlin for  
475 neuroblastoma and adrenal gland samples, respectively. Additional post-mortem human adrenal  
476 glands for staining's were obtained from the NIH Neurobiobank (University of Maryland,  
477 Baltimore, MD) under the same ethical permit from Stockholm Regional Ethical Review Board and  
478 the Karolinska University Hospital Research Ethics Committee. All samples were obtained  
479 following an informed patient consent. Samples were processed following the Nuc-Seq protocol  
480 [28] as illustrated in Supplementary Figure 1. Briefly, nuclei are obtained from deep frozen tissue  
481 after homogenization and filtration, and further FACs sorted in 384-wells plates where cDNA  
482 synthesis was conducted with Smart-seq2 [29]. Libraries were prepared using the Tn5 transposase  
483 tagmentation (Nextera XT), and their quality was assessed with fragment analyzer. High quality  
484 libraries were sequenced using Illumina HiSeq 2500, and further de-multiplexed with deindexer  
485 (<https://github.com/ws6/deindexer>) using the Nextera index adapters and the 384-well layout.

486 Mouse samples were collected via surgical resection after perfusion under the ethical permit  
487 N32/14 issued by Jordbruksverket in accordance with the declaration of Helsinki. The tissue from

488 each sample was dissociated and sorted in 384-well plates. Sorted cells were lysed and their RNA  
489 obtained using the Smart-seq2 protocol [29], and further processed as described above.

490

### 491 **Read mapping, quality control, and cell clustering**

492 We planned an experimental design that allowed us to obtain and analyze high quality data [30]. To  
493 select high quality reads we allowed for a hard-clipping of adaptors (using CutAdapt 1.13), and  
494 excluded reads with less than 20 bases. Additional diagnostics on the reads quality were conducted  
495 with FASTQC (<https://www.bioinformatics.babraham.ac.uk/projects/fastqc>), cells with reads  
496 failing at three or more quality control (QC) tests (among eleven in total including per base- and  
497 sequence quality scores, frequency of each nucleotide, GC content, over-represented motifs, and  
498 number of duplicated reads) were excluded for further analysis. High quality reads were mapped  
499 with STAR [31] using 2-pass alignment to have improved performance of *de novo* splice junction  
500 reads.

501 High quality reads from human samples were mapped to the hg38 human genome version  
502 hg38/GRCh38.p12 (released 2019), annotated by the comprehensive annotation of GENCODE 28  
503 [32] as obtained from the UCSC browser [33] on 25.02.2019. Reads from mouse were mapped to  
504 the mm10 mouse genome version mm10/GRCm38.p6 (released 2019), annotated by the  
505 comprehensive annotation of GENCODE 18 [32] obtained from the UCSC browser [33] on  
506 14.01.2019. In both cases, alternative chromosomes were excluded from the annotations, and in the  
507 cases of human reads mapping to the mitochondrial genome were excluded (as mitochondrial reads  
508 in nuc-Seq can originate from different cells). Gene expression (i.e. read counts allowing  
509 ambiguity) was calculated using HTSeq [34].

510 To conduct a QC of the cells, different technical and biological features were calculated with  
511 QoRT [35] and Celloline [36]. After an inspection of the features, cell for human adrenal glands  
512 expressing at least 3,000 and at most 9,000 genes, and from mouse adrenals and neuroblastoma  
513 expressing at least 2,000 and at most 8,000 genes were selected for further analysis.

514

## 515 **Expression analysis**

516 Gene expression of cells/nuclei was filtered, transformed, scaled and standardized accounting for  
517 sequence depth, using PAGODA [37]. In particular error models for individual cells were fitted  
518 with parameters robust for noisy data (i.e. min.count.threshold of 2 and at least 5 non-failed  
519 measurements per gene). These models were successfully generated for all high-quality cells from  
520 mouse ( $n=1,763$ ) and human ( $n=1,322$ ) adrenal glands, and ( $n=3,212$ ) in neuroblastoma. PAGODA  
521 clusters cells based on non-redundant significant aspects of transcriptional heterogeneity. The  
522 resulting hierarchical clustering was cut by height initially to maximize the silhouette value [38],  
523 and further adjusted to increase the resolution of the defined clusters (i.e. cell/nuclei populations).  
524 The standardized expression for mouse E12 and E13 adrenal anlagen (i.e. expression magnitude)  
525 was obtained from the PAGODA rds application from [6] kindly provided by the authors.

526 The standardized gene expression from PAGODA (i.e. expression magnitude) was used to  
527 determine the genes (A) significantly up-regulated in each cluster, and (B) significantly and  
528 uniquely up-regulated in each cluster (i.e. specific gene signature). In particular, for a given  
529 population, the group of genes significantly up-regulated in each cluster (i.e. A) is determined as the  
530 genes whose average expression is significantly higher than the average expression of cells in all  
531 the other clusters. In contrast, the group of genes significantly and uniquely up-regulated in each  
532 cluster (i.e. B: specific gene signature) is defined as the group of genes whose average expression is  
533 significantly higher than each and all of the other clusters' averages. This significance was  
534 calculated using Benjamini-Hochberg multiple test correction on Welch's *t*-test generated *p*-values,  
535 with a *FDR* threshold of 0.01.

536 Gene expression in specific clusters was validated using RNA-scope. Fresh frozen samples were  
537 prepared following the manufacturer (ACD Bio) instructions, and the RNA from target genes  
538 labeled with the Multiplex Fluorescent Reagent Kit v2.

539

## 540 **Cell cluster analysis**

541 We calculated the under- and over-representation of cells in clusters for neuroblastoma samples,  
542 INSS stages, and risk groups, with two-sided Chi-square tests using Yates adjustment and corrected  
543 with the Benjamini-Hochberg approach and a *FDR* threshold of 0.01. In particular, Chi-square tests  
544 evaluated the hypothesis that a given case study (risk group for instance) presented a significantly  
545 larger or lower proportion of cells in a given cell cluster.

546 The enrichment of gene ontology (GO) terms was calculated for the significantly up-regulated  
547 genes in each cluster using a Benjamini-Hochberg multiple test correction on Fisher's exact test *p*-  
548 values. The same approach was taken to determine the enrichment of significantly up-regulated  
549 genes defining 1) mesenchymal (MES) and adrenergic (ADR) cell types by [16], and 2)  
550 Sympathetic Noradrenergic (Group 1) and Neural crest cell-like (Group 2) by [15]. In particular,  
551 Fisher's exact tests evaluated the hypothesis that genes significantly up-regulated in a given cell  
552 cluster were significantly enriched in a gene set of interest. To conduct inter-species comparisons,  
553 only the 1:1 human:mouse orthologues annotated by ENSEMBL version GRCh38.p12 [39] were  
554 considered.

555 To compare the clusters among the various study cases, four different approaches were taken. In  
556 the first approach a comparison of specific gene signatures was conducted following the gene  
557 enrichment approach described above, using a *FDR* threshold of 0.01 and a minimum number of  
558 shared genes of 10 (marginally significant results with *FDR*<0.05 are included in the supplementary  
559 tables). In the second approach (as displayed in Figure 7), the average standardized expression (i.e.  
560 expression magnitude calculated with PAGODA) from each population was computed and further  
561 quantile-normalized using the limma package [40]. Further, Euclidean pairwise distances were  
562 calculated for cell populations using their quantile-normalized average gene expression values, and  
563 a hierarchical clustering was conducted using Ward's-2 distance with hclust package and supported  
564 with the approximately unbiased *p*-value from the pvclust package [41]. In addition a tSNE was  
565 built with the Rtsne package (<https://github.com/jkrijthe/Rtsne>).

566 For the third and fourth approaches the raw gene counts were filtered, normalized and rescaled  
567 using Satija's pipeline [42]. With these values, we conducted as a third approach an asymmetrical  
568 cluster imputation of NB cells using as reference human AG- cells with Seurat version 3 [43]. In  
569 particular, genes expressed in more than 5 cells, expressed in at least 2 genes were selected. Further  
570 processing was conducted using the top 2,000 most variable genes after variance transformation and  
571 dimension reduction. Finally, as a fourth approach we calculated a signature score for reference  
572 specific gene signatures (obtained as described above) using Scanpy [44]. This signature score  
573 calculates the average expression of the reference genes in the specific gene signature per 10,000  
574 per cell + 1, minus the average of a ( $n$ ) randomly selected set of genes per 10,000 per cell + 1  
575 (where  $n = \max [\# \text{ reference genes}, 50]$ ). The signature score provides an estimation of the  
576 transcriptional resemblance of each cell to each reference specific gene signature.

577 The similarity between clusters of 1) post-natal and fetal [14] human adrenal glands, and 2)  
578 neuroblastoma in this study and from the GOSH cohort [13], were estimated by two different  
579 approaches: 1) computing the enrichment of genes in the specific signatures for genes in the  
580 reference clusters (i.e. fetal adrenal gland and GOSH cohort), and 2) computing the signature score  
581 for the same references. Gene enrichments were computed with Benjamini-Hochberg corrected  
582 Fisher's exact tests. Reference gene sets for human fetal adrenal gland were obtained from the  
583 differentially expressed genes (with an adjusted  $p < 0.01$ ) in five sympathoadrenal cell types in fetal  
584 adrenal glands (i.e. SCP, cycling and non-cycling sympathoblast/chomaffin cells) reported in [14].  
585 The original cluster annotations are debated and the included labels in this study correspond to  
586 those given by Kildisiute et al. [45], and Bedoya-Reina and Schlisio [46]. Reference gene sets for  
587 the GOSH cohort were obtained from the algorithmic markers of different cell population in eight  
588 neuroblastoma tumors sequenced by 10X and reported in [13].

589

590 **Analysis of bulk RNA-seq neuroblastoma samples**

591 For gene sets of interest (i.e. target genes), Kaplan-Meier curves were calculated using the 498  
592 SEQC database [17] and the tools available in the R2 database (<http://r2.amc.nl>). Specifically, the  
593 average standardized expression (*z*-score) for target genes in the 498 SEQC database was  
594 calculated, and further classified into two patient groups using the “scan modus” in the  
595 KaplanScanner tool. The event free-survival probability was estimated with a logrank test between  
596 these two groups and corrected with Bonferroni for multiple tests. Only specific gene signatures  
597 with more than two genes were studied (i.e. specific gene signature from NOR nC5 cluster was  
598 excluded as  $n=2$ ).

599 Sets of genes significantly 1) up-regulated in patients classified in high- ( $n=6,696$ ) or non-high-  
600 (i.e. low/intermediate,  $n=8,158$ ) risk groups, and 2) directly ( $n=4,572$ ) or inversely ( $n=3,982$ )  
601 correlated with age at diagnosis, were obtained with the GeneSelector tool in R2 for the 498 SEQC  
602 database. RPMs were log<sub>2</sub>-transformed and the difference between risk groups was calculated for  
603 each gene using FDR-corrected ANOVAs. Pearson correlations were computed between gene  
604 expression and age at diagnosis with FDR-corrected *p*-values signaling the chances of obtaining the  
605 correlation coefficient in an uncorrelated dataset. Similarly, gene sets with a significantly higher  
606 expression in poor (i.e. worst,  $n=9,049$ ) or better ( $n=5,842$ ) survival cases were retrieved with the  
607 Kaplan Meier Scanner Pro tool, using FDR-correct *p*-values obtained with logrank tests between  
608 groups of patients with different event free-survival probabilities. Significant genes were selected  
609 with a *FDR* threshold of 0.01 . Gene enrichment were further calculated with Fisher’s exact tests  
610 corrected with the Benjamini-Hochberg approach.

611 To calculate the proportion of cells of each neuroblastoma cluster in a larger cohort, 172  
612 TARGET neuroblastoma samples (National Cancer Institute TARGET, dbGap Study Accession:  
613 phs000218.v16.p6.) were deconvolved using the reference-based decomposition model in  
614 BisqueRNA with the default settings [47]. In comparison with other popular methods,  
615 deconvolution by this BisqueRNA has been shown to produce the closest mean estimations to the  
616 cell proportions obtained by single nuclei-RNA [47]. Bulk expression from each sample was



617 decomposed into the 10 neuroblastoma cell types using as reference 42,215 genes present in the  
618 annotation of both bulk and single-nuclei, filtering 1,676 zero-variance and 383 unexpressed genes.  
619 To make an accurate deconvolution, bulk-sequence raw data obtained for the 172 TARGET  
620 neuroblastoma samples were pre-processed and quantified in a similar way as the single-nuclei data.  
621 Briefly, reads were hard-clipped for adapters and low quality calls, and reads with less than 20  
622 bases were excluded. High quality pair-reads were mapped with STAR [31] using 2-pass  
623 alignments to the hg38 human genome version hg38/GRCh38.p12 (released 2019) annotated with  
624 the comprehensive annotation of GENCODE 28 [32], and further quantified with HTSeq [34]. The  
625 expected (i.e. proportional) number of cells per cluster for each deconvolved sample was computed  
626 as the product of the predicted cluster percentage, and the proportional number of cells ( $c$ ) in the  
627 TARGET NB samples ( $c$ =[average number of nuclei from 11 nuc-Seq neuroblastomas in the same  
628 risk group x number of TARGET NB samples in the risk group]). Significance of the expected (i.e.  
629 proportional) number of cells was computed with Benjamini-Hochberg corrected Chi-squares tests  
630 with Yates' adjustment.

631

### 632 **Genome rearrangement analysis**

633 Genome rearrangements of cells (i.e. copy number variants) were determined using inferCNV  
634 v1.4.0 of the Trinity CTAT Project (<https://github.com/broadinstitute/inferCNV>). InferCNV was  
635 computed with the gene expression for 7 samples (out of the initial 11: K87, K10, 23, K55, K3, 19,  
636 and K6) that presented cells in the immune clusters: macrophages (nC6) and/or T-cells (nC10).  
637 Arrangements in these cells were used as a non-malignant reference. Copy number variations  
638 (CNVs) were calculated from moving averages of 101-genes' windows with the default hidden  
639 Markov model. Tumor cells were simulated to have CNVs with probabilities ( $p$ ) that matched six  
640 possible states, from a chromosomal segment complete loss to a gain of more than 2 copies  
641 (1=complete loss, 2=loss of one copy, 3=neutral, 4=addition of one copy, 5=addition of 2 copies,  
642 6=addition of more than 2 copies). These probabilities were used to estimate the likelihood of

643 observing a rearrangement (total sum of  $p$ ) and to select the most likely state (maximum  $p$ ). CNVs  
644 with a (Bayesian) likelihood value of 0.1 (probability of being true rearrangements greater than 0.9)  
645 were selected for further analysis.

646 For each sample independently, rearrangements (i.e. expected states) in each region of interest  
647 (i.e. 1p loss, 11q loss, and 17q gain) were computed for each cell as the average of the most likely  
648 state (as either gain or loss) for the overlapping CNVs. The significance for gains or losses in each  
649 cluster was calculated by testing the hypothesis that the number of cells with the rearrangement was  
650 significantly higher than expected, using a Benjamini-Hochberg corrected Fisher's exact test.  
651 Rearrangements for tumor samples were confirmed using Affymetrix 250K microarrays as previous  
652 indicated in [20]. In particular, microarray data was processed using GDAS software (Affymetrix)  
653 and CNVs were estimated using CNAG v3.0 (<http://www.genome.umin.jp>).

654

#### 655 **Cell velocities and differentiation potential analysis**

656 To calculate the differentiation trajectory of cells, the percentage of splicing and unspliced genes  
657 per cell was estimated with velocity [18]. Further, the cell velocities were calculated using scVelo  
658 [18,19]. To obtain high confidence velocities (as confirmed by visual inspection of confidence  
659 scores) for human adrenal gland we selected genes with a minimum number of shared read counts  
660 of 40, and built the velocities using the top 600 genes. For mouse adrenal gland, these parameters  
661 were 3,000 and 1,000, respectively. Further, the gene transition over the pseudotime (representing  
662 the cell's internal clock, and the approximate time of cell differentiation) was determined using a  
663 multiple kinetic regimes, and illustrated for the selected populations of interest. The differentiation  
664 potential of cells was determined with Palantir [48] using the default parameters, and as starting cell  
665 the one with the highest expression of the precursor marker *ERBB3*. This approach uses entropy to  
666 estimate cell plasticity in modeled trajectories of cells fates, so that cell plasticity increases with  
667 entropy.

668

669 All data generated during and/or analyzed during the current study are available in the manuscript  
670 and/or the Supplementary Materials, or otherwise available from the corresponding authors on  
671 reasonable request. Raw sequences for human adrenal gland were stored in the Synapse ID  
672 projectsyn22301662 (<https://www.synapse.org/#!/Synapse:syn22302430>), with the following ID  
673 numbers: syn22302285 and syn25189163 (sample 6657), syn22301836 (sample 6435), and  
674 syn22301667 (sample 16-D). Raw sequences for neuroblastoma were stored in the Synapse ID  
675 projectsyn22302605 (<https://www.synapse.org/#!/Synapse:syn22310692>), with the following ID  
676 numbers: syn22307346 (sample K87), syn22306928 (sample K6), syn22306349(sample K55),  
677 syn22305928 (sample K47), syn22305408 (sample K40), syn22304935(sample K3), syn22304482  
678 (sample K2), syn22304038 (sample K14), syn22303649(sample K10), syn22303256 (sample 23),  
679 and syn22302820 (sample 19). Raw sequences for mouse adrenal gland were stored in the Synapse  
680 ID project syn22308005(<https://www.synapse.org/#!/Synapse:syn22310690>), with the following ID  
681 numbers: syn22308008 (sample 6801), syn22308616 (sample 6802), syn22309301 (sample 3431),  
682 syn22310231 (sample 3432), and syn22309843 (sample I1). RNA-sequences from neuroblastoma  
683 available at: National Cancer Institute TARGET, dbGap Study Accession: phs000218.v16.p6.  
684 Similarly, the code used for the current study is available in  
685 [https://github.com/oscarcbr/single\\_cell\\_tools](https://github.com/oscarcbr/single_cell_tools) or otherwise available from the corresponding authors  
686 on reasonable request to use, redistribute it and/or modify under the terms of the GNU General  
687 Public License as published by the Free Software Foundation; either version 2 of the License, or  
688 any later version.

689

## 690 **References:**

- 691 [1] Brodeur, G. Neuroblastoma: biological insights into a clinical enigma. *Nature Reviews Cancer*  
692 **3**, 203 (2003).
- 693 [2] Brodeur, G. & Bagatell, R. Mechanisms of neuroblastoma regression. *Nature Reviews Clinical*  
694 *Oncology* **11**, 704 (2014).
- 695 [3] Cohn, S. et al. The International Neuroblastoma Risk Group (INRG) classification system: an  
696 INRG Task Force report. *Journal of Clinical Oncology* **10**, 289-297 (2009).

- 697 [4] Brodeur, G. et al. Revisions of the international criteria for neuroblastoma diagnosis, staging,  
698 and response to treatment. *Journal of Clinical Oncology* **11**, 1466-1477 (1993).
- 699 [5] Moroz, V. et al. Changes over three decades in outcome and the prognostic influence of age-at-  
700 diagnosis in young patients with neuroblastoma: a report from the International Neuroblastoma Risk  
701 Group Project. *European Journal of Cancer* **47**, 561-571 (2011).
- 702 [6] Furlan, A. et al. Multipotent peripheral glial cells generate neuroendocrine cells of the adrenal  
703 medulla. *Science* **357**, eaal3753 (2017).
- 704 [7] Saito, D., Takase, Y., Murai, H. & Takahashi, Y. The dorsal aorta initiates a molecular cascade  
705 that instructs sympatho-adrenal specification. *Science* **336**, 1578-1581 (2012).
- 706 [8] Kirino, K., Nakahata, T., Taguchi, T. & Saito, M. Efficient derivation of sympathetic neurons  
707 from human pluripotent stem cells with a defined condition. *Scientific Reports* **8**, 12865 (2018).
- 708 [9] Delloye-Bourgeois, C. et al. Microenvironment-driven shift of cohesion/detachment balance  
709 within tumors induces a switch toward metastasis in neuroblastoma. *Cancer Cell* **32**, 427-443  
710 (2017).
- 711 [10] De Preter, K. et al. Human fetal neuroblast and neuroblastoma transcriptome analysis confirms  
712 neuroblast origin and highlights neuroblastoma candidate genes. *Genome Biology* **7**, R84 (2006).
- 713 [11] Kastriti, M. et al. Schwann cell precursors generate the majority of chromaffin cells in  
714 Zuckerkandl organ and some sympathetic neurons in paraganglia. *Frontiers in Molecular*  
715 *Neuroscience* **12**, 6 (2019).
- 716 [12] Schober, A. et al. Cell Loss and Autophagy in the Extra-Adrenal Chromaffin Organ of  
717 Zuckerkandl are Regulated by Glucocorticoid Signalling. *Journal of Neuroendocrinology* **25**, 34-47  
718 (2013).
- 719 [13] Kildisiute, G. et al. Tumor to normal single-cell mRNA comparisons reveal a pan-  
720 neuroblastoma cancer cell. *Science Advances* **7**, eabd3311 (2021).
- 721 [14] Dong, R. et al. Single-Cell Characterization of Malignant Phenotypes and Developmental  
722 Trajectories of Adrenal Neuroblastoma. *Cancer Cell*. **38**, 1-18 (2020).
- 723 [15] Boeva, V. et al. Heterogeneity of neuroblastoma cell identity defined by transcriptional  
724 circuitries. *Nature Genetics* **49**, 1408–1413 (2017).
- 725 [16] van Groningen, T. et al. Neuroblastoma is composed of two super-enhancer-associated  
726 differentiation states. *Nature Genetics* **49**, 1261 (2017).
- 727 [17] Su, Z. et al. An investigation of biomarkers derived from legacy microarray data for their  
728 utility in the RNA-seq era. *Genome Biology* **15**, 523 (2014).
- 729 [18] La Manno, G. et al. RNA velocity of single cells. *Nature* **560**, 494-498 (2018).
- 730 [19] Bergen, V., Lange, M., Peidli, S., Wolf, F. & Theis, F. Generalizing RNA velocity to transient  
731 cell states through dynamical modeling. *bioRxiv* , 820936 (2019).
- 732 [20] Carén, H. et al. High-risk neuroblastoma tumors with 11q-deletion display a poor prognostic,  
733 chromosome instability phenotype with later onset. *PNAS* **107**, 4323-4328 (2010).

- 734 [21] Butter, J.T., Hall, L.L, Smith, K.P., & Lawrence, J.B. Changing Nuclear Landscape and  
735 Unique PML Structures During Early Epigenetic Transitions of Human Embryonic Stem Cells.  
736 *Journal of Cellular Biochemistry* **107**, 609-621.
- 737 [22] Haghverdi, L., Lun, A., Morgan, M. & Marioni, J. Batch effects in single-cell RNA-sequencing  
738 data are corrected by matching mutual nearest neighbors. *Nature Biotechnology* **36**, 421-427  
739 (2018).
- 740 [23] Stuart, T. & Satija, R. Integrative single-cell analysis. *Nature Reviews Genetics* **20**, 257-272  
741 (2019).
- 742 [24] Zhang, Q. et al. Landscape and dynamics of single immune cells in hepatocellular carcinoma.  
743 *Cell* **179**, 829-845 (2019).
- 744 [25] Mussina, K., Toktarkhanova, D. & Filchakova, O. Nicotinic Acetylcholine Receptors of PC12  
745 Cells. *Cellular and Molecular Neurobiology* <https://doi.org/10.1007/s10571-020-00846-x> (2020).
- 746 [26] Sinkus, M. et al. The human CHRNA7 and CHRFAM7A genes: A review of the genetics,  
747 regulation, and function. *Neuropharmacology* **96**, 274-288 (2015).
- 748 [27] Ju, Y., Asahi, T. & Sawamura, N. Arctic A $\beta$ 40 blocks the nicotine-induced neuroprotective  
749 effect of CHRNA7 by inhibiting the ERK1/2 pathway in human neuroblastoma cells.  
750 *Neurochemistry International* **110**, 49-56 (2017).
- 751 [28] Krishnaswami, S. et al. Using single nuclei for RNA-seq to capture the transcriptome of  
752 postmortem neurons. *Nature Protocols* **11**, 499 (2016).
- 753 [29] Picelli, S. et al. Smart-seq2 for sensitive full-length transcriptome profiling in single cells.  
754 *Nature Methods* **10**, 1096 (2013).
- 755 [30] Kalisky, T. et al. A brief review of single-cell transcriptomic technologies. *Briefings in*  
756 *Functional Genomics* **17**, 64-76 (2017).
- 757 [31] Dobin, A. et al. STAR: ultrafast universal RNA-seq aligner. *Bioinformatics* **29**, 15-21 (2013).
- 758 [32] Frankish, A. et al. GENCODE reference annotation for the human and mouse genomes.  
759 *Nucleic Acids Research* **47**, D766-D773 (2019).
- 760 [33] Haeussler, M. et al. The UCSC genome browser database: 2019 update. *Nucleic Acids*  
761 *Research* **47**, D853-D858 (2019).
- 762 [34] Anders, S., Pyl, P. & Huber, W. HTSeq—a Python framework to work with high-throughput  
763 sequencing data. *Bioinformatics* **31**, 166-169 (2015).
- 764 [35] Hartley, S. & Mullikin, J. QoRTs: a comprehensive toolset for quality control and data  
765 processing of RNA-Seq experiments. *BMC bioinformatics* **16**, 224 (2015).
- 766 [36] Ilicic, T. et al. Classification of low quality cells from single-cell RNA-seq data. *Genome*  
767 *Biology* **17**, 29 (2016).
- 768 [37] Fan, J. et al. Characterizing transcriptional heterogeneity through pathway and gene set  
769 overdispersion analysis. *Nature Methods* **13**, 241 (2016).
- 770 [38] Rousseeuw, P. Silhouettes: a graphical aid to the interpretation and validation of cluster  
771 analysis. *Journal of Computational and Applied Mathematics* **20**, 53-65 (1987).

- 772 [39] Cunningham, F. et al. Ensembl 2019. *Nucleic Acids Research* **47**, D745-D751 (2019).
- 773 [40] Ritchie, M. et al. limma powers differential expression analyses for RNA-sequencing and  
774 microarray studies. *Nucleic Acids Research* **43**, e47-e47 (2015).
- 775 [41] Suzuki, R. & Shimodaira, H. Pvcust: an R package for assessing the uncertainty in  
776 hierarchical clustering. *Bioinformatics* **22**, 1540-1542 (2006).
- 777 [42] Satija, R., Farrell, J., Gennert, D., Schier, A. & Regev, A. Spatial reconstruction of single-cell  
778 gene expression data. *Nature Biotechnology* **33**, 495-502 (2015).
- 779 [43] Stuart, T. et al. Comprehensive integration of single-cell data. *Cell* **177**, 1888-1902 (2019).
- 780 [44] Wolf, F., Angerer, P. & Theis, F. SCANPY: large-scale single-cell gene expression data  
781 analysis. *Genome Biology* **19**, 15 (2018).
- 782 [45] Kildisiute, G. Young, M.D., & Behjati, S. Pitfalls of applying mouse markers to human adrenal  
783 medullary cells. *Cancer Cell* **39**, 132-133 (2021).
- 784 [46] Bedoya-Reina, Oscar C. & Schlisio S. Chromaffin cells with sympathoblast signature: too  
785 similar to keep apart?. *Cancer Cell* **39**, 134-135 (2021).
- 786 [47] Jew, B. et al. Accurate estimation of cell composition in bulk expression through robust  
787 integration of single-cell information. *Nature Communications* **11**, 1-11 (2020).
- 788 [48] Setty, M. et al. Characterization of cell fate probabilities in single-cell data with Palantir.  
789 *Nature Biotechnology* **37**, 451-460 (2019).
- 790 [49] Rege, J. et al. Bone morphogenetic protein-4 (BMP4): a paracrine regulator of human adrenal  
791 C19 steroid synthesis. *Endocrinology* **156**, 2530-2540 (2015).
- 792 [50] Aragao-Santiago, L. et al. Mouse models of primary aldosteronism: from physiology to  
793 pathophysiology. *Endocrinology* **158**, 4129-4138 (2017).
- 794 [51] Rainey, W. Adrenal zonation: clues from 11 $\beta$ -hydroxylase and aldosterone synthase.  
795 *Molecular and Cellular Endocrinology* **151**, 151-160 (1999).
- 796 [52] Nishimoto, K. et al. Adrenocortical zonation in humans under normal and pathological  
797 conditions. *Journal of Clinical Endocrinology & Metabolism* **95**, 2296-2305 (2010).
- 798 [53] Peters, B. et al. StAR expression and the long-term aldosterone response to high-potassium diet  
799 in Wistar-Kyoto and spontaneously hypertensive rats. *American Journal of Physiology -*  
800 *Endocrinology and Metabolism* **292**, E16-E23 (2007).
- 801 [54] Bergman, J. et al. The human adrenal gland proteome defined by transcriptomics and antibody-  
802 based profiling. *Endocrinology* **158**, 239-251 (2017).
- 803 [55] Romero, D. et al. Disabled-2 is expressed in adrenal zona glomerulosa and is involved in  
804 aldosterone secretion. *Endocrinology* **148**, 2644-2652 (2007).
- 805 [56] Boulkroun, S. et al. Adrenal cortex remodeling and functional zona glomerulosa hyperplasia in  
806 primary aldosteronism. *Hypertension* **56**, 885-892 (2010).
- 807 [57] Nishimoto, K., Rainey, W., Bollag, W. & Seki, T. Lessons from the gene expression pattern of  
808 the rat zona glomerulosa. *Molecular and Cellular Endocrinology* **371**, 107-113 (2013).

- 809 [58] Allen, A., Zhuo, J. & Mendelsohn, F. Localization and function of angiotensin AT1 receptors.  
810 *American Journal of Hypertension* **13**, 31S-38S (2000).
- 811 [59] Aguilera, G. Role of angiotensin II receptor subtypes on the regulation of aldosterone secretion  
812 in the adrenal glomerulosa zone in the rat. *Molecular and Cellular Endocrinology* **90**, 53-60 (1992).
- 813 [60] Wang, W., Yang, L., Suwa, T., Casson, P. & Hornsby, P. Differentially expressed genes in  
814 zona reticularis cells of the human adrenal cortex. *Molecular and Cellular Endocrinology* **173**, 127-  
815 134 (2001).
- 816 [61] Rainey, W. & Nakamura, Y. Regulation of the adrenal androgen biosynthesis. *Journal of*  
817 *Steroid Biochemistry and Molecular Biology* **108**, 281-286 (2008).
- 818 [62] Pohorecky, L. & Wurtman, R. Adrenocortical control of epinephrine synthesis.  
819 *Pharmacological Reviews* **23**, 1-35 (1971).
- 820 [63] Winkler, H. & Fischer-Colbrie, R. The chromogranins A and B: the first 25 years and future  
821 perspectives. *Neuroscience* **49**, 497-528 (1992).
- 822 [64] Carbone, E., Borges, R., Eiden, L., García, A. & Hernández-Cruz, A. Chromaffin Cells of the  
823 Adrenal Medulla: Physiology, Pharmacology, and Disease. 1443-1502 (2019).
- 824 [65] Albillos, A. & McIntosh, J. Human nicotinic receptors in chromaffin cells: characterization and  
825 pharmacology. *Pflügers Archiv - European Journal of Physiology* **470**, 21-27 (2018).
- 826 [66] Guérineau, N. Cholinergic and peptidergic neurotransmission in the adrenal medulla: A  
827 dynamic control of stimulus-secretion coupling. *IUBMB Life* **72**, 553-567 (2020).
- 828 [67] Hone, A. et al. Expression of  $\alpha 3\beta 2\beta 4$  nicotinic acetylcholine receptors by rat adrenal  
829 chromaffin cells determined using novel conopeptide antagonists. *Journal of Neurochemistry* ,  
830 (2020).
- 831 [68] Gahring, L., Myers, E., Palumbos, S. & Rogers, S. Nicotinic receptor Alpha7 expression  
832 during mouse adrenal gland development. *PLoS One* **9**, e103861 (2014).
- 833 [69] Huber, K. et al. Development of chromaffin cells depends on MASH1 function. *Development*  
834 **129**, 4729-4738 (2002).
- 835 [70] Uezumi, A. et al. Identification and characterization of PDGFR $\alpha$ + mesenchymal progenitors in  
836 human skeletal muscle. *Cell Death & Disease* **5**, e1186-e1186 (2014).
- 837 [71] Carr, M. et al. Mesenchymal precursor cells in adult nerves contribute to mammalian tissue  
838 repair and regeneration. *Cell Stem Cell* **24**, 240-256 (2019).
- 839 [72] Hosaka, K. et al. Pericyte-fibroblast transition promotes tumor growth and metastasis.  
840 *Proceedings of the National Academy of Sciences* **113**, E5618-E5627 (2016).
- 841 [73] Havis, E. et al. Transcriptomic analysis of mouse limb tendon cells during development.  
842 *Development* **141**, 3683-3696 (2014).
- 843 [74] Agarwal, P. et al. Mesenchymal niche-specific expression of CXCL12 controls quiescence of  
844 treatment-resistant leukemia stem cells. *Cell Stem Cell* **24**, 769-784 (2019).

- 845 [75] Picard, D. et al. Markers of survival and metastatic potential in childhood CNS primitive  
846 neuro-ectodermal brain tumours: an integrative genomic analysis. *Lancet Oncology* **13**, 838-848  
847 (2012).
- 848 [76] Cheng, W., Kandel, J., Yamashiro, D., Canoll, P. & Anastassiou, D. Slug-based epithelial-  
849 mesenchymal transition gene signature is associated with prolonged time to recurrence in  
850 glioblastoma. *Nature Precedings* , 1-1 (2011).
- 851 [77] Sen, A. & Ta, M. Altered Adhesion and Migration of Human Mesenchymal Stromal cells  
852 under febrile temperature Stress involves nf- $\kappa$  $\beta$  pathway. *Scientific Reports* **10**, 1-14 (2020).
- 853 [78] Schnurch, H. & Risau, W. Expression of tie-2, a member of a novel family of receptor tyrosine  
854 kinases, in the endothelial cell lineage. *Development* **119**, 957-968 (1993).
- 855 [79] Iljin, K. et al. A fluorescent Tie1 reporter allows monitoring of vascular development and  
856 endothelial cell isolation from transgenic mouse embryos. *FASEB Journal* **16**, 1764-1774 (2002).
- 857 [80] François, M. et al. Sox18 induces development of the lymphatic vasculature in mice. *Nature*  
858 **456**, 643-647 (2008).
- 859 [81] Sehgal, A. et al. The role of CSF1R-dependent macrophages in control of the intestinal stem-  
860 cell niche. *Nature Communications* **9**, 1-17 (2018).
- 861 [82] Kim, W. et al. CD163 identifies perivascular macrophages in normal and viral encephalitic  
862 brains and potential precursors to perivascular macrophages in blood. *American Journal of*  
863 *Pathology* **168**, 822-834 (2006).
- 864 [83] Ryncarz, R. & Anasetti, C. Expression of CD86 on human marrow CD34+ cells identifies  
865 immunocompetent committed precursors of macrophages and dendritic cells. *Blood, The Journal of*  
866 *the American Society of Hematology* **91**, 3892-3900 (1998).
- 867 [84] Sintes, J., Romero, X., de Salort, J., Terhorst, C. & Engel, P. Mouse CD84 is a pan-leukocyte  
868 cell-surface molecule that modulates LPS-induced cytokine secretion by macrophages. *Journal of*  
869 *Leukocyte Biology* **88**, 687-697 (2010).
- 870 [85] Kamermans, A. et al. Setmelanotide, a novel, selective melanocortin receptor-4 agonist exerts  
871 anti-inflammatory actions in astrocytes and promotes an anti-inflammatory macrophage phenotype.  
872 *Frontiers in Immunology* **10**, 2312 (2019).
- 873 [86] Gil, D., Schamel, W., Montoya, M., Sánchez-Madrid, F. & Alarcón, B. Recruitment of Nck by  
874 CD3 $\epsilon$  reveals a ligand-induced conformational change essential for T-cell receptor signaling and  
875 synapse formation. *Cell* **109**, 901-912 (2002).
- 876 [87] Qu, Y., Taylor, J., Bose, A. & Storkus, W. Therapeutic effectiveness of intratumorally  
877 delivered dendritic cells engineered to express the pro-inflammatory cytokine, interleukin (IL)-32.  
878 *Cancer Gene Therapy* **18**, 663-673 (2011).
- 879 [88] Wu, J. et al. An activating immunoreceptor complex formed by NKG2D and DAP10. *Science*  
880 **285**, 730-732 (1999).
- 881 [89] Natarajan, K. et al. An allosteric site in the T-cell receptor C $\beta$  domain plays a critical signalling  
882 role. *Nature Communications* **8**, 1-14 (2017).



- 883 [90] Hagiwara, N. Sox6, jack of all trades: a versatile regulatory protein in vertebrate development.  
884 *Developmental Dynamics* **240**, 1311-1321 (2011).
- 885 [91] Britsch, S. et al. The ErbB2 and ErbB3 receptors and their ligand, neuregulin-1, are essential  
886 for development of the sympathetic nervous system. *Genes & Development* **12**, 1825-1836 (1998).
- 887 [92] Kia, S. et al. RTTN mutations link primary cilia function to organization of the human cerebral  
888 cortex. *American Journal of Human Genetics* **91**, 533-540 (2012).
- 889 [93] Fiorino, A. et al. Retina-derived POU domain factor 1 coordinates expression of genes relevant  
890 to renal and neuronal development. *International Journal of Biochemistry & Cell Biology* **78**, 162-  
891 172 (2016).
- 892 [94] Khaled, W. et al. BCL11A is a triple-negative breast cancer gene with critical functions in stem  
893 and progenitor cells. *Nature Communications* **6**, 1-10 (2015).
- 894 [95] Srivastava, A. et al. De novo dominant ASXL3 mutations alter H2A deubiquitination and  
895 transcription in Bainbridge-Ropers syndrome. *Human Molecular Genetics* **25**, 597-608 (2016).
- 896 [96] Snippert, H. et al. Intestinal crypt homeostasis results from neutral competition between  
897 symmetrically dividing Lgr5 stem cells. *Cell* **143**, 134-144 (2010).
- 898 [97] Stolt, C., Lommes, P., Hillgärtner, S. & Wegner, M. The transcription factor Sox5 modulates  
899 Sox10 function during melanocyte development. *Nucleic Acids Research* **36**, 5427-5440 (2008).
- 900 [98] Sanchez-Ortiz, E. et al. NF1 regulation of RAS/ERK signaling is required for appropriate  
901 granule neuron progenitor expansion and migration in cerebellar development. *Genes &*  
902 *Development* **28**, 2407-2420 (2014).
- 903 [99] Casazza, A. et al. Sema3E-Plexin D1 signaling drives human cancer cell invasiveness and  
904 metastatic spreading in mice. *Journal of Clinical Investigation* **120**, 2684-2698 (2010).
- 905 [100] Li, C. et al. Snail-induced claudin-11 prompts collective migration for tumour progression.  
906 *Nature Cell Biology* **21**, 251 (2019).
- 907
- 908 [101] Yang, Y., Wang, C. & Van Aelst, L. DOCK7 interacts with TACC3 to regulate interkinetic  
909 nuclear migration and cortical neurogenesis. *Nature Neuroscience* **15**, 1201-1210 (2012).
- 910 [102] Ryan, M., Tizard, R., VanDevanter, D. & Carter, W. Cloning of the LamA3 gene encoding  
911 the alpha 3 chain of the adhesive ligand epiligrin. Expression in wound repair.. *Journal of*  
912 *Biological Chemistry* **269**, 22779-22787 (1994).
- 913 [103] Gao, L. et al. Gene expression analyses reveal metabolic specifications in acute O<sub>2</sub>-sensing  
914 chemoreceptor cells. *Journal of Physiology* **595**, 6091-6120 (2017).
- 915 [104] Herold, S. et al. Recruitment of BRCA1 limits MYCN-driven accumulation of stalled RNA  
916 polymerase. *Nature* **567**, 545-549 (2019).
- 917 [105] Nguyen, B. et al. Cross-regulation between Notch and p63 in keratinocyte commitment to  
918 differentiation. *Genes & Development* **20**, 1028-1042 (2006).
- 919 [106] Takenobu, H. et al. CD133 suppresses neuroblastoma cell differentiation via signal pathway  
920 modification. *Oncogene* **30**, 97-105 (2011).

- 921 [107] Oomori, Y., Habara, Y. & Kanno, T. Muscarinic and nicotinic receptor-mediated Ca<sup>2+</sup>  
922 dynamics in rat adrenal chromaffin cells during development. *Cell and Tissue Research* **294**, 109-  
923 123 (1998).
- 924 [108] Driscoll, T., Cosgrove, B., Heo, S., Shurden, Z. & Mauck, R. Cytoskeletal to nuclear strain  
925 transfer regulates YAP signaling in mesenchymal stem cells. *Biophysical journal* **108**, 2783-2793  
926 (2015).
- 927 [109] Vidal, V. et al. The adrenal capsule is a signaling center controlling cell renewal and zonation  
928 through Rspo3. *Genes & Development* **30**, 1389-1394 (2016).
- 929 [110] Clarke, R. et al. The expression of Sox17 identifies and regulates haemogenic endothelium.  
930 *Nature Cell Biology* **15**, 502-510 (2013).
- 931 [111] Ya, J. et al. Sox4-deficiency syndrome in mice is an animal model for common trunk.  
932 *Circulation Research* **83**, 986-994 (1998).
- 933 [112] Dominguez-Soto, A. et al. Dendritic Cell-Specific ICAM-3-Grabbing Nonintegrin Expression  
934 on M2-Polarized and Tumor-Associated Macrophages Is Macrophage-CSF Dependent and  
935 Enhanced by Tumor-Derived IL-6 and IL-10. *Journal of Immunology* **186**, 2192-2200 (2011).
- 936 [113] Rapp, G. et al. CD4<sup>+</sup> CD7<sup>-</sup> leukemic T-cells from patients with Sezary syndrome are  
937 protected from galectin-1-triggered T-cell death. *Leukemia* **16**, 840-845 (2002).
- 938 [114] Kawabata, K., Ehata, S., Komuro, A., Takeuchi, K. & Miyazono, K. TGF- $\beta$ -induced  
939 apoptosis of B-cell lymphoma Ramos cells through reduction of MS4A1/CD20. *Oncogene* **32**,  
940 2096-2106 (2013).
- 941 [115] Zah, E., Lin, M., Silva-Benedict, A., Jensen, M. & Chen, Y. T-cells expressing CD19/CD20  
942 bispecific chimeric antigen receptors prevent antigen escape by malignant B cells. *Cancer*  
943 *Immunology Research* **4**, 498-508 (2016).
- 944 [116] Leadbetter, E. et al. Chromatin-IgG complexes activate B cells by dual engagement of IgM  
945 and Toll-like receptors. *Nature* **416**, 603-607 (2002).
- 946 [117] Scriba, L. et al. Cancer Stem Cells in Pheochromocytoma and Paraganglioma. *Frontiers in*  
947 *Endocrinology* **11**, 79 (2020).
- 948 [118] Pinto, L. et al. AP2 $\gamma$  regulates basal progenitor fate in a region-and layer-specific manner in  
949 the developing cortex. *Nature Neuroscience* **12**, 1229 (2009).
- 950 [119] Vervoort, S. et al. Global transcriptional analysis identifies a novel role for SOX4 in tumor-  
951 induced angiogenesis. *Elife* **7**, e27706 (2018).
- 952 [120] Beilharz, E. et al. Neuronal activity induction of the stathmin-like gene RB3 in the rat  
953 hippocampus: possible role in neuronal plasticity. *Journal of Neuroscience* **18**, 9780-9789 (1998).

**Figure 1. Anatomy of human and mouse adrenal gland (AG) revealed from single nuclei/cell analysis.** **a**, 1,536 single nuclei of human AG from three different patients were sequenced with Smart-seq2 to an average depth of 485,000 reads per cell. Cells with high-quality ( $n=1,322$ ) were selected and further processed with PAGODA. Cells were grouped into ten different clusters, including cortex (in brown and gray colors), chromaffin (blue hC4), mesenchymal (purple hC7), endothelial (light blue hC6) and immune cells (i.e. T-cells hC10 and Macrophages hC2 in green colors). **b**, 1,920 single cell of mouse AG from five different samples were sequenced with Smart-seq2 to an average depth of 670,000 reads per cell. High-quality reads were mapped to the mouse genome with STAR, and gene expression was estimated with HTSeq. Cells with high-quality ( $n=1,763$ ) were selected and further processed with PAGODA. Cells were grouped into nineteen different clusters, including cortex (in brown and gray colors), chromaffin (blue mC15 and light blue mC11), mesenchymal (red mC6), capsule (purple mC13), endothelial (light blue mC2 and mC4), glial (orange mC10) and immune cells (i.e. T-cells mC17 and mC18, and Macrophages mC3, mC8 and mC14 in green colors). **c-d**, A comparison of the specific gene signature between human and mouse revealed a similar transcription signatures for mesenchymal, endothelial and immune, nevertheless the two different post-natal chromaffin cells can only be differentiated in mouse (i.e. by the expression of *CHRNA7*). **e-g**, Furthermore, a population of cells with progenitor markers (i.e. *SOX6+*, *ERBB3+*, *RTTN+*) and high differentiation potential found uniquely in human AG, is sourcing the chromaffin cells as indicated by velocity, entropy, and pseudotime analyses. **h**, In this process, gene expression elapses from an undifferentiated stem-like- (i.e. *RTTN+*) to an adrenergic signature (*PNMT+*), passing by a noradrenergic stage (i.e. *DBH+*), as indicated by the pseudotime of the underlying cellular processes.

**Figure 2. Location of human cholinergic progenitor (*NTRK2+CLDN11+*) and chromaffin (*TH+*) cells within the post-natal human adrenal gland (AG).**

**a**, tSNE representing the  $\log(\text{read counts per } 10,000 \text{ per cell} + 1)$  of indicated genes expressed in human cholinergic progenitors and chromaffin population. **b-f**, Overview of tile-scanned images (20x) of post-natal human adrenal glands (AG) at indicated age. Scalebar of overview: 200 $\mu\text{m}$ , zoom of boxed image: 10 $\mu\text{m}$ . **b-d**, RNAscope *in situ* hybridization (ISH) for *TH* (green), *CLDN11* (red) and *NTRK2* (white) mRNA and counter stained with DAPI (blue). *NTRK2+ CLDN11+* double positive cells were found in adrenal capsule and medulla exclusive from *TH* positive cells. **e**, RNAscope ISH of a 4 year old AG labeled with for *TH* (green), *CHRNA7* (red) and *CLDN11* (white) mRNA and nuclear counter-stain (DAPI) as indicated.

**Figure 3. Intratumoral heterogeneity of childhood neuroblastoma (NB).** 4,224 single nuclei of human NB tumors of different stages were sequenced with Smart-seq2 to an average depth of 676,000 reads per cell. Cells with high-quality ( $n=3,212$ ) were selected and further processed with PAGODA. **a**, Cells were grouped into ten different clusters, broadly separated into two different sections (**b**): favorable NB (high *TrkA*/NTRK1, low *TrkB*/NTRK2), and non-favorable NB (low *TrkA*, high *TrkB*). Non-favorable NB included cells expressing stem cell-like genes and featured high *Mycn* expression. NB risk groups and stages are exemplified in **b**. **c**, Representation of the cell clusters: Undifferentiated (light pink nC2, and pink nC3), mesenchymal stroma (MSC red nC1), endothelial (light blue nC4), T-cells (light green nC10), macrophages (green nC6), and noradrenergic (“NOR”, blue nC5, nC7, nC8, and nC9); and various markers for cell types of interest: noradrenergic, mesenchymal, endothelial and immune, for favorable and unfavorable outcomes, and hypoxia-, and metastasis-associated (also in insert **d**). **e-f**, Using a gene enrichment-based approach, the noradrenergic clusters of NB (nC5, nC7, nC8 and nC9) proved to share a significant number of up-regulated genes with the sympathetic noradrenergic and the “ADR” (i.e. adrenergic) transcriptional signatures described by Boeva et al. [15] and van Groningen et al. [16], respectively. Oppositely, the undifferentiated cluster nC3 shared a significant number of up-regulated genes with the neural crest cell-like signature and the MES (i.e. mesenchymal) signatures described by Boeva et al. [15] and van Groningen et al. [16] (respectively). **g**, A comparison of the

gene-specific signature of the neuroblastoma clusters with the markers previously reported for six cell-clusters in 8 tumors sequenced with 10X (GOSH samples, Kildisiute et al. [13]), suggests a larger similarity of the noradrenergic clusters (nC5, nC7, nC8 and nC9) with tumor clusters 1, 2, and 3, and a stronger similarity of the undifferentiated nC3 cluster with tumor cluster 3 that exhibits a weaker sympathoblast signal [13]. Only clusters with the most significant similarities are displayed (Supplementary Table 4). **h**, An analysis of the CNVs in the different clusters indicates a significant number of cells with rearrangements (indicated by red, Fisher exact corrected with Benjamini-Hochberg for multiple tests) in the undifferentiated cluster nC3 for most samples, while a remarkable number of rearrangements was observed in fewer samples for the NOR (nC5), MSC (nC1), and undifferentiated nC2 clusters. **i**, A subset of the predicted CNVs was validated for each sample, and illustrated in the tSNE for cells with an expected rearrangement (i.e. expected state)  $\square$  overlapping the validated region.

**Figure 4. RNA *in situ* hybridization validating intratumoral heterogeneity in high-risk neuroblastoma stage 4.** Overview of tile-scanned images (20x) high-risk neuroblastoma (K10, *MYCN* amplified) using RNAscope *in situ* hybridization. Scalebar of overview: 500 $\mu$ m; zoom of boxed image: 10 $\mu$ m. **a**, Tumor labeled with RNAscope ISH for *TH* (green), *MYCN* (red) and *ALK* (white) mRNA and counter stained with DAPI (blue). Dashed circles indicate cells with large nuclei in a region (box #1), that are *TH* and *MYCN* positive, but negative for *ALK*. Box #2 indicates part of the tumor with majority of cells double positive for *MYCN* and *ALK* but negative for *TH*. Box #4 indicates cells negative for all probes: *TH*, *MYCN* and *ALK*. **b**, Adjacent section from (a) labeled for *TH* (green), *NTRK1* (red) and *NTRK2* (white). Box #1 indicate cells with large nuclei in a region that are *TH*<sup>+</sup> and *NTRK1*<sup>+</sup>, and negative for *NTRK2*. Surrounding cells with small nuclei are positive for *NTRK2* only. Box #2,3 visualizes tumor region with majority of cells positive for *NTRK2* that are negative for *TH* and *NTRK1*. **c**, Adjacent section stained for *PDGFRA* (green), *LGR5* (red) and *NTRK2* (white) mRNA is highlighting cells double positive for *LGR5* and *NTRK2* (box #1) or double positive for *PDGFRA*, *NTRK2* (box #2). Box #3 indicates a region of the tumor that is positive for *NTRK2* only. **d**, Adjacent section stained for mesenchymal markers *PDGFRA* (green), *CLDN11* (red) and *LGR5* (white). Similar to **c**: some tumor regions (box #1) highlight cells double positive for *CLDN11* (red) and *LGR5* (white) that are negative for *PDGFRA* (box #1), as were other regions show cells that are double positive for *PDGFRA* (green) and *CLDN11* (red) (box #2,3 and 4).

**Figure 5. Cell clusters from neuroblastoma and healthy post-natal human and mouse adrenal glands share expression signatures.** **a**, Heatmap illustrating the normalized expression magnitude for selected genes organized following the hierarchical clustering (PAGODA) as shown in Figures 1 and 3. **b-d**, Venn diagrams illustrating the significantly shared specific gene signature. Shared genes are listed in Supplementary Table 5. Indicated *FDR* were calculated with a Benjamini-Hochberg correction on *p*-values obtained with Welch's *t*-tests as detailed in the Methods. **b**, Venn diagrams of human neuroblastoma clusters compared to adult mouse post-natal clusters, **c**, embryonic mouse clusters previously described [6], and **d**, human post-natal adrenal gland clusters. **e**, Comparison of the specific signature from the human neuroblastoma clusters and the reported transcriptional signal for human fetal adrenal glands cell clusters (Dong et al. [14]). \* The original cluster annotations are currently debated and the included labels here correspond to those given by Kildisiute et al. [45], and Bedoya-Reina and Schlisio [46].

**Figure 6. Cell clusters from neuroblastoma and developing human and mouse adrenal glands share distinct expression signatures, and their expression is associated with patient survival and age at diagnosis.** tSNE of neuroblastoma clusters illustrating the signature score of genes characterizing **a**, human post-natal and **b**, embryonic [14] adrenal glands, and, **c**, mouse embryonic adrenal anlagen (E13) cell clusters [6]. Signature score = [(Reference gene set average read counts

per 10,000 per cell + 1) – (Random gene set average read counts per 10,000 per cell + 1)]. SCP = refers to the signature score of genes significantly up-regulated in cluster of mouse multi-potent Schwann cell precursors at E13; Bridge = refers to the signature score of genes significantly up-regulated in cell cluster that defines transiting cells from SCP towards chromaffin population. **d**, Kaplan Meier curves for the signature genes from the neuroblastoma clusters with significant differences (Bonferroni Corrected, logrank tests) in survival for 498 SEQC neuroblastoma patients [17]. **e-g**, Using a gene enrichment-based approach (Benjamini-Hochberg corrected, Fisher's exact tests), the specific signature genes for the noradrenergic nC7, nC8, and nC9, endothelial nC4, macrophages nC6, and undifferentiated nC3 clusters were found to be significantly up-regulated in low- and intermediate-risk patients and also in individuals with better survival. In contrast, the signature genes of noradrenergic nC9 and undifferentiated nC3 clusters presented a significantly enrichment in patients with high-risk and poor survival. The signature genes of undifferentiated nC3 cluster presented also a remarkable significant correlation with age at diagnosis. **h**, Signature genes associated with poor survival for noradrenergic nC9 and undifferentiated nC3 clusters are significantly correlated with age at diagnosis, and oppositely those associated with better survival are inversely correlated with age. Genes are included in Supplementary Table 6.

**Figure 7. Commonalities in the transcriptional profile of cell population in post-natal and developing human and mouse adrenal gland, and neuroblastoma.** **a**, tSNE plot of snRNA-seq clusters for the projection of human adrenal gland cell states (reference) onto neuroblastoma (query), based on the detection of mutual nearest neighbor cell anchors (Seurat v3). Joint visualization of same neuroblastoma cell clustering (bottom) after cell classification, colors corresponding to transferred adrenal gland cell states. **b**, Heatmap of the overall profiles of probability of best matching cell populations including number of cells between neuroblastoma and adrenal gland. **c**, tSNE using Euclidean distances in the quartile-normalized matrix of the average normalized expression from single-cell/nuclei sequenced cell populations: from (A) human i) neuroblastoma and ii) adrenal gland; and (B) mouse i) adrenal gland, and ii) derived adrenal anlagen at E12 and E13 (reported by Furlan et al. [6]). Mesenchymal, endothelial and neural-crest derived populations from human and mouse, adrenal gland, and neuroblastoma group accordingly to gene expression in i) adrenergic and noradrenergic cells, ii) undifferentiated cells, iv) mesenchymal, and v) endothelial cells. **d**, Hierarchical-clustering of transcriptional similarities between cell clusters (**c**) supported with unbiased *p*-values [41]. Green numbers in the branches indicates a high support (i.e. unbiased *p*-value >95) that has a lowest support at 0 and a highest at 100.

**Supplementary Figure 1. a-b**, Overview of the pipeline used to sample, sequence and analyze single nuclei/cell from mouse and human adrenal glands (AG) and neuroblastoma (NB). **a**, Samples were collected and processed following sc-Seq [29] and the nuc-Seq protocols [28]. Nuclei (for fresh frozen human samples) and whole cells (for mouse samples) were obtained and FACs-sorted in 384-wells plates. Libraries were prepared with Smart-Seq2 and sequenced with Illumina HiSeq 2500. **b**, High-quality reads and cells were selected for further analysis with PAGODA. After clustering, gene expression for each cluster was determined and further compared with other case studies and reference databases using four different approaches detailed in Methods. Different technical and biological features characterize single(-whole cell, i.e. sc-Seq), and single(-nucleus, i.e. nuc-Seq) sequencing. **c**, Features associated to partial transcript splicing and transcription noise are higher in nuc-Seq than in sc-Seq, including the percentage of intronic, indels in read alignments, and intergenic reads. Oppositely, features associated to (cytoplasmic) mature transcripts are higher in sc-Seq than in nuc-Seq, including percentage of intragenic and exonic reads.

**Supplementary Figure 2. a-b**, Chromaffin cells in mouse are grouped in two different clusters characterized by the low and high expression of nAChR  $\alpha 7$  (encoded by *Chrna7*). **a**, Velocity analysis suggests that each group has a different fate and do not inter-convert between them. **b**, A

panel of noradrenergic markers is shared between the two population, and others characterize each cluster, particularly the expression in *Pnmt* is higher in mC11 in comparison to mC15 ( $FDR < 0.01$ , Welch's *t*-test). Other genes that have a higher (non-significant) average expression include *Cartpt*, *Isl1*, and *Hand1*. Oppositely, the expression of *Epas1*, *Cox8b*, *Ndufa4l2*, *Phox2b* and *Neurod4* is significantly higher ( $FDR < 0.01$ ) in mC15 than in mC11. The expression of a repertoire of Muscarinic and Nicotinic cholinergic receptors is higher in mC15 than mC11 ( $FDR < 0.01$ , Welch's *t*-test). **c-d**, Specific signatures significantly shared between human adrenal gland and mouse adrenal anlagen at **(c)** E13 and **(d)** E12 ( $FDR < 0.01$ , Welch's *t*-test, marginally significant results are included in Supplementary Table 3). **e**, Overview of tile-scanned images (20x) of post-natal human adrenal glands (AG) at indicated age. Scalebar of overview: 200 $\mu$ m, zoom of boxed image (indicating capsule): 10 $\mu$ m. RNAscope *in situ* hybridization for *TH* (green) labeling adrenal medulla, *RSPO3* (red) labeling adrenal capsule and *CYP11B2* (white) labeling adrenal cortex. Nuclei were counter-stained with DAPI (blue).

**Supplementary Figure 3. a-c**, RNAscope ISH zoom images of AG of indicated age as shown in Figure 2 without *TH* (green) channel. *NTRK2* mRNA is shown in white and *CLDN11* mRNA is shown in red. Scalebar: 10 $\mu$ m. **d-f**, Overview images of tile-scanned (20x) post-natal human AG at indicated age. Scalebar of overview: 200 $\mu$ m, zoom of boxed image: 10 $\mu$ m. Adrenal medulla labeled with RNAscope *in situ* hybridization for *TH* (green), *SOX10* (red) and *NTRK2* (white) mRNA and counter stained with DAPI (blue). *NTRK2*+ positive cells were exclusive from *SOX10*+ cells.

**Supplementary Figure 4.** Different cell populations are differently represented in neuroblastoma risks groups and INSS stages. In particular, clusters of undifferentiated and stroma cell clusters in NB (i.e. nC1, nC3 and nC4) represent a larger proportion of cells in high-risk neuroblastoma, while noradrenergic clusters (i.e. nC7, nC8, and nC9) represent a larger proportion of cells in low-risk neuroblastoma (top right). 172 TARGET NB bulk-sequenced samples (NB172 NCI TARGET project) in different risks groups were deconvolved to estimate the expected number of cells from each NB cell clusters (top left). A significant higher number of cells (Benjamini-Hochberg corrected Chi-square tests) was recapitulated in high-risks samples for clusters MSC nC1, Undifferentiated nC3, and Endothelial nC4; and in low-risk for NOR clusters nC7, nC8, and nC9. Cell numbers in deconvolution correspond to the product of the predicted proportion of cells for each cluster, and the proportional number of cells in the TARGET NB samples ([average number of single-nuclei in risk group] x [number of TARGET NB samples in the risk group]).

**Supplementary Figure 5. *In situ* transcriptomic images of favorable neuroblastoma 4S and stage 2B.** Overview of tile-scanned (20x) favorable neuroblastoma after RNAscope ISH. Scalebar of overview: 200 $\mu$ m; zoom of boxed image: 10 $\mu$ m. **a-c**, RNAscope ISH of low-risk INSS stage 4S neuroblastoma **(a)** for *NTRK1* (red), *NTRK2* (white) and *TH* (green) revealing homogeneous expression of *NTRK1* and *TH* mRNA in the of entire tumor section with no evidence of *NTRK2* positive cells. **b**, RNAscope ISH for *PDGFRA* (green), *CLDN11*(red) and *LGR5* (white) reveals no expression of these mRNAs. **c**, RNAscope ISH for *PRRX1* (green), *DBH* (red) and *PHOX2B* (white) showing homogeneous expression of *DBH* and *PHOX2B* mRNA in the entire tumor with no evidence of *PRRX1* positive cells. **d**, RNAscope ISH in low-risk INSS stage 2B neuroblastoma revealing a more heterogeneous pattern of *DBH* (red) and *PHOX2B* (white) positive tumor region with no evidence of *PRRX1* (green) labeled cells. **e**, RNAscope ISH for *PDGFRA* (green), *CLDN11* (red) and *LGR5* (white) in adjacent section of **(d)** with no evidence of their expression. Only one small region of the entire tumor (box #4) showed positively labeled cells.

**Supplementary Figure 6. a**, Specific genes signatures significantly shared between neuroblastoma and mouse adrenal anlagen at E12. Kaplan Meier curves for genes with significant differences (Bonferroni corrected, logrank tests) in survival for 498 SEQC neuroblastoma patients [17] for **b-c**,

signature genes from the neuroblastoma undifferentiated nC3 and NOR nC9 clusters, directly and inversely correlated with age at diagnosis in 498 SEQC neuroblastoma patients [17]. A gene enrichment-based approach (Benjamini-Hochberg corrected, Fisher's exact tests) of the specific signature genes for the NOR nC9, and undifferentiated nC3 clusters in 498 SEQC neuroblastoma patients [17], indicates different biological processes (GO) associated with **d-e**, survival and **f-g**, age-at-diagnosis. At most the top ten GO terms with  $FDR < 0.01$  are shown.  $\cap$  symbol signifies the intersection between the two gene sets.

**Supplementary Table 1.** Samples, cells and reads details and statistics for each case study, before and after quality controls.

**Supplementary Table 2.** List of cured markers from literature used to annotate cell populations in mouse and human adrenal glands (AG). Only genes with a significantly high expression in any cluster "x" (i.e.  $FDR(sCx > sCo) \leq 0.01$ ) are included in the table.  $FDR(sCx > sCo)$  and  $FDR(sCx > sCy)$  test the hypotheses that the expression of a gene in cell cluster "x" is higher than in cells from all other clusters ("Each cluster in s: FDR" column), and that in cluster "y" ("Each cluster in pairwise comparison s: FDR" column), respectively, for a given case study "s". FDRs were calculated with a Benjamini-Hochberg correction on Welch's *t*-Tests (as detailed in Methods). Clusters with  $FDR(sCx > sCo) \leq 0.01$  are included in the column "Evidence for high expression in cluster". All clusters *y* in this column that do not present in pairwise comparisons any  $FDR(sCx > sCy) \leq 0.01$  are included in the column "Evidence for higher expression in cluster". List of specific gene signatures for clusters in human and mouse post-natal adrenal gland, and neuroblastoma calculated as detailed in Methods.

**Supplementary Table 3.** Cell populations in human post-natal adrenal glands sharing a significant specific gene signature with 1) mouse post-natal-, 2) human fetal adrenal glands [14], and 3) developing (E13) mouse [6], as detailed in Methods ( $FDR < 0.05$ , Fisher's exact test).

**Supplementary Table 4.** Gene enrichment analysis for neuroblastoma and selected study cases, namely van Groningen et al. [16], and Boeva et al. [15], and cell populations in neuroblastoma sharing a significant gene specific signature with markers in GOSH neuroblastoma (10X-sequenced) cell clusters [13], as detailed in methods ( $FDR < 0.05$ , Fisher's exact test).

**Supplementary Table 5.** Cell populations in neuroblastoma sharing a significant specific gene signature with 1) mouse post-natal-, 2) developing (E13) mouse [6], 3) human post-natal-, and 4) human fetal- [14] adrenal glands, as detailed in Methods ( $FDR < 0.05$ , Fisher's exact test).

**Supplementary Table 6.** Genes in the specific signature of neuroblastoma cell populations significantly enriched in different 1) risk- and 2) survival groups, and 3) significantly correlated with age at diagnosis, as detailed in methods ( $FDR < 0.05$ , Fisher's exact test).

**Supplementary Table 7.** Biological processes (GO) enrichment for genes in the specific signature of neuroblastoma cell populations 1) significantly enriched in different survival groups, and 2) significantly correlated with age at diagnosis, as detailed in methods ( $FDR < 0.05$ , Fisher's exact test).

Figure 1

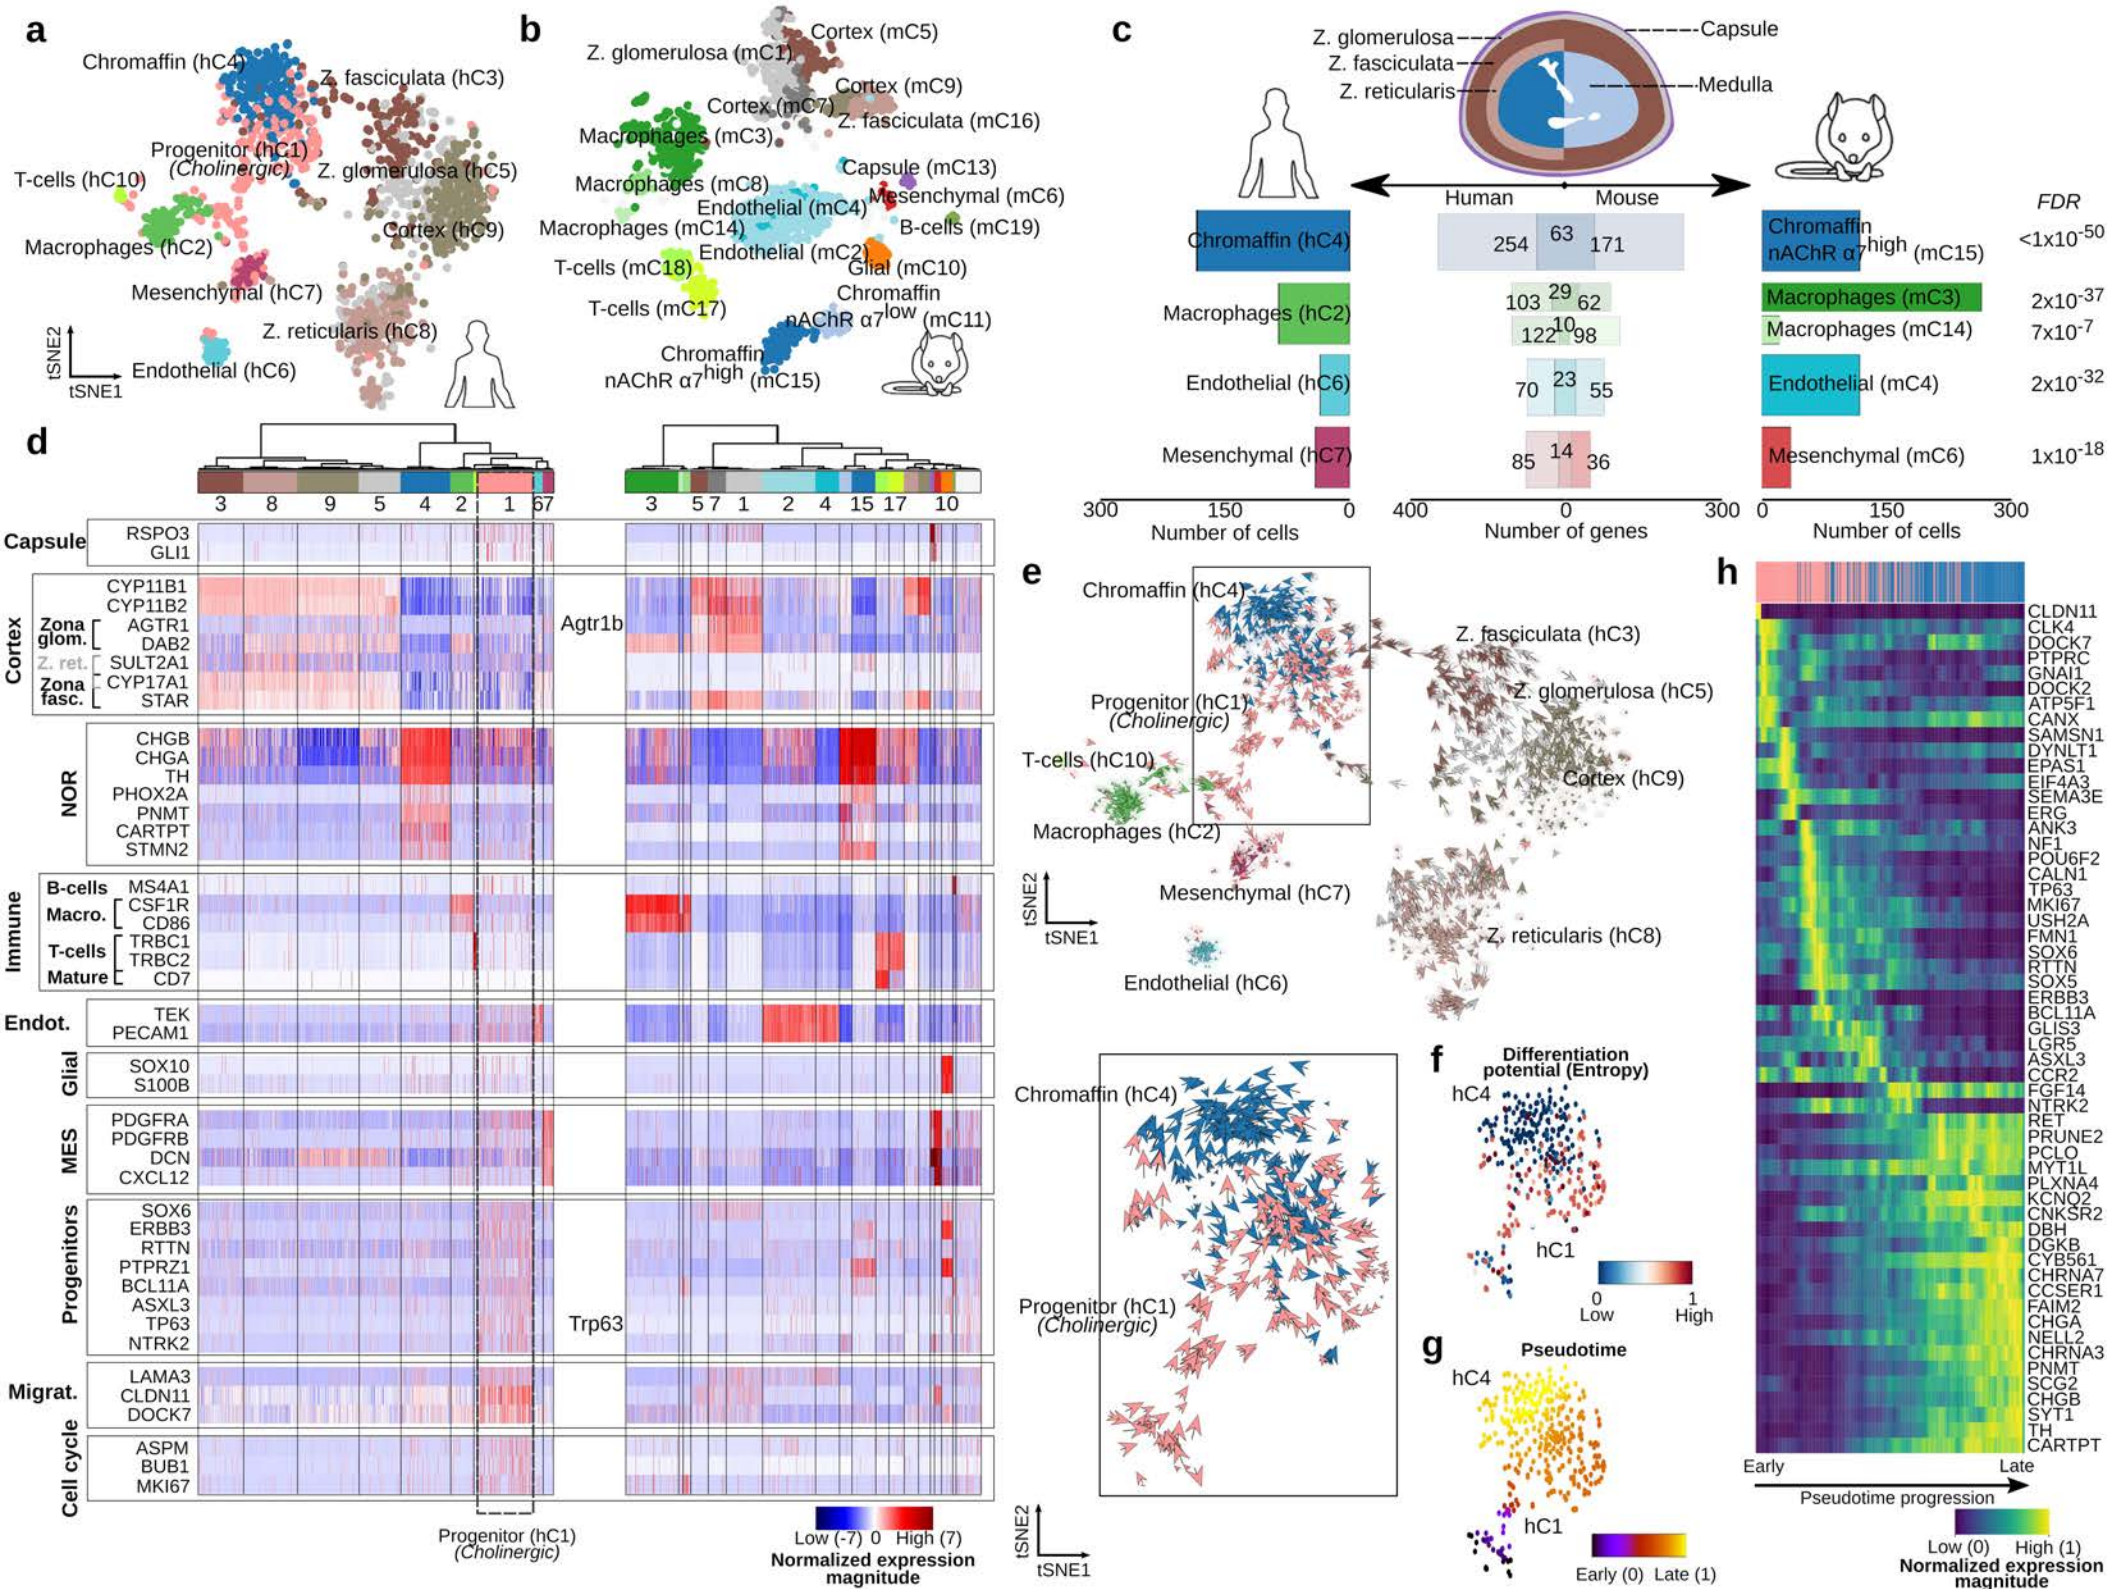



Figure 2

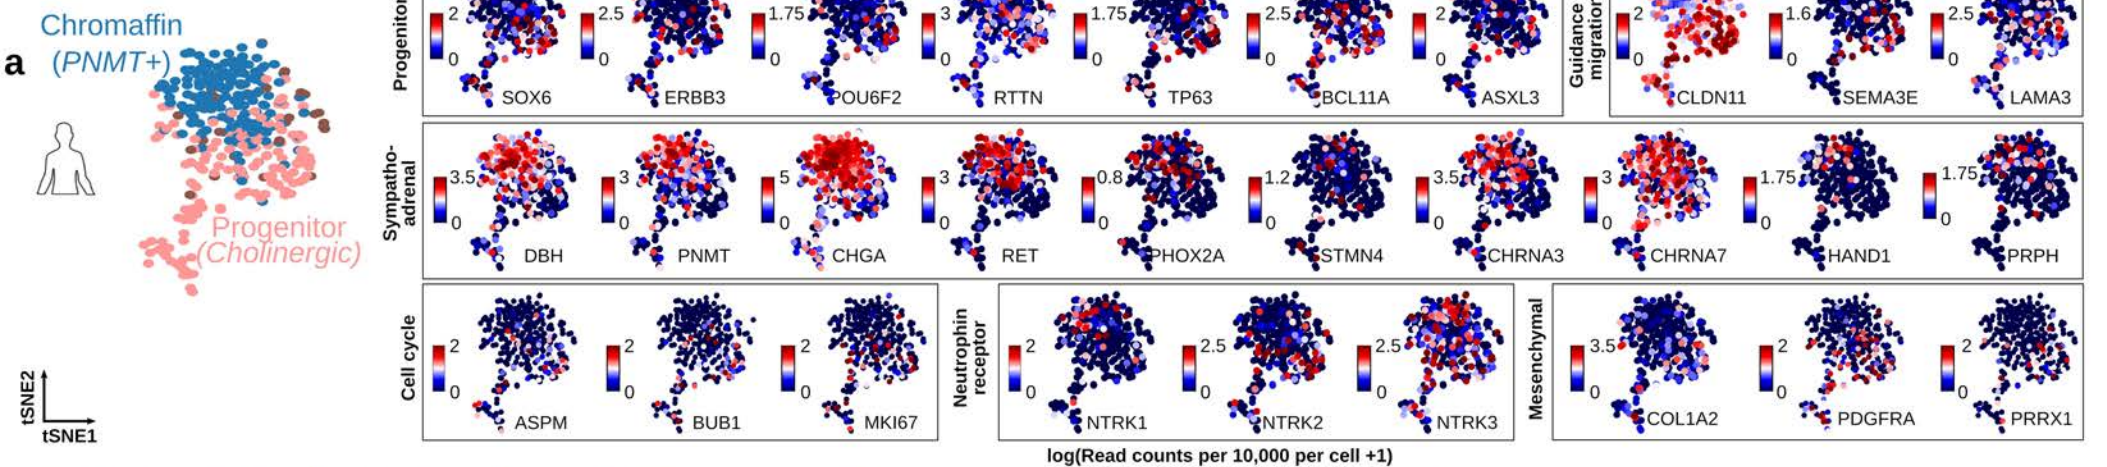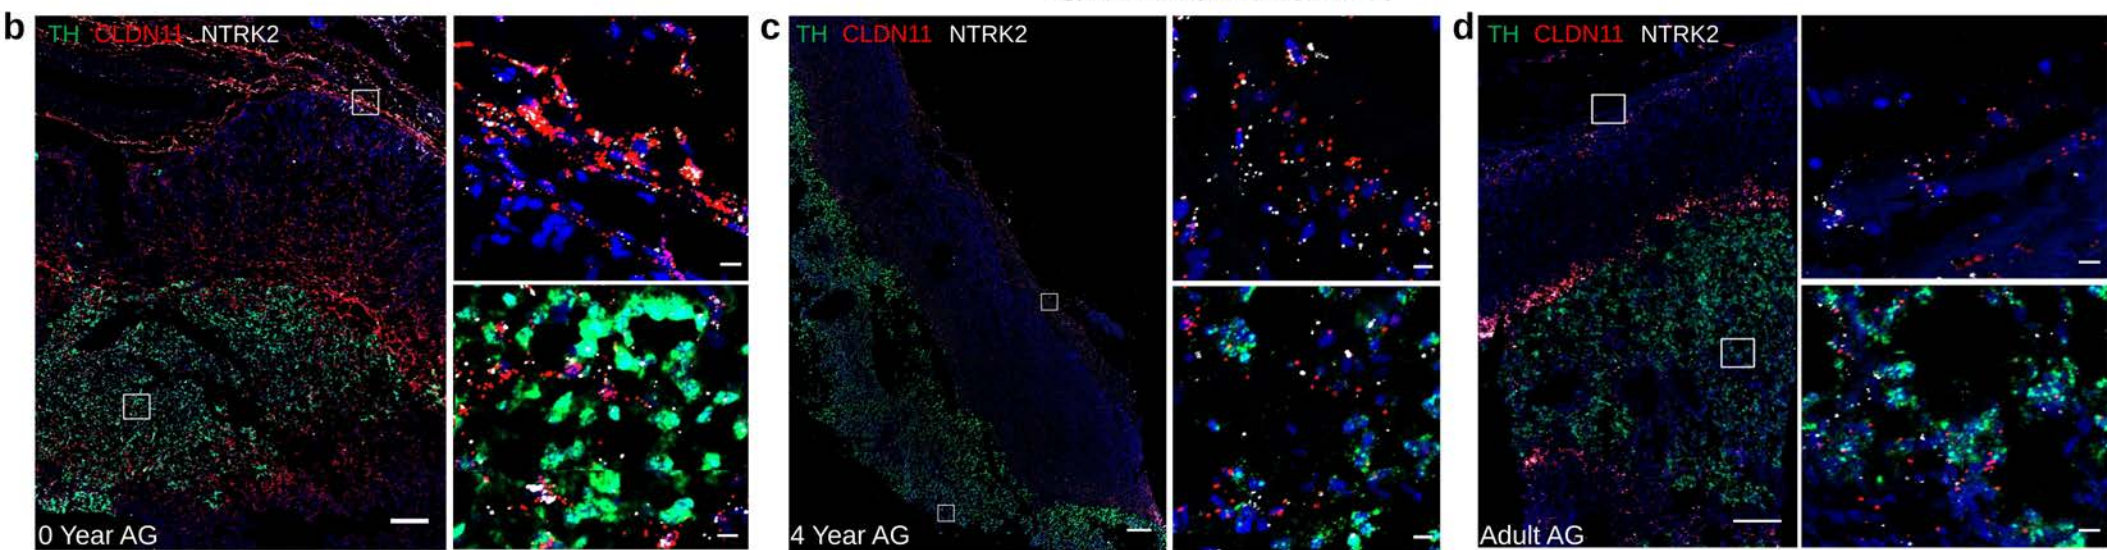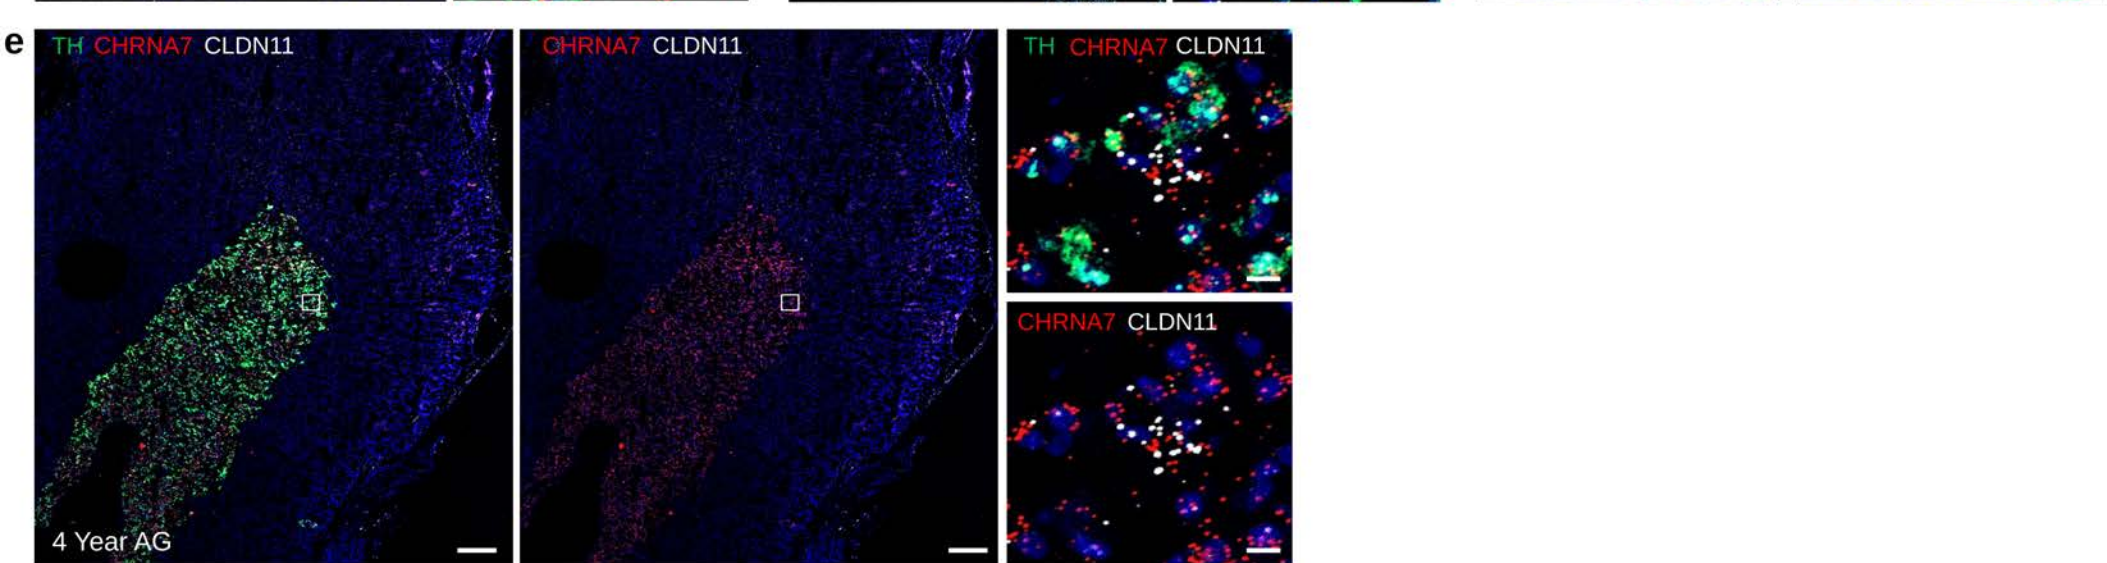

**Figure 3**

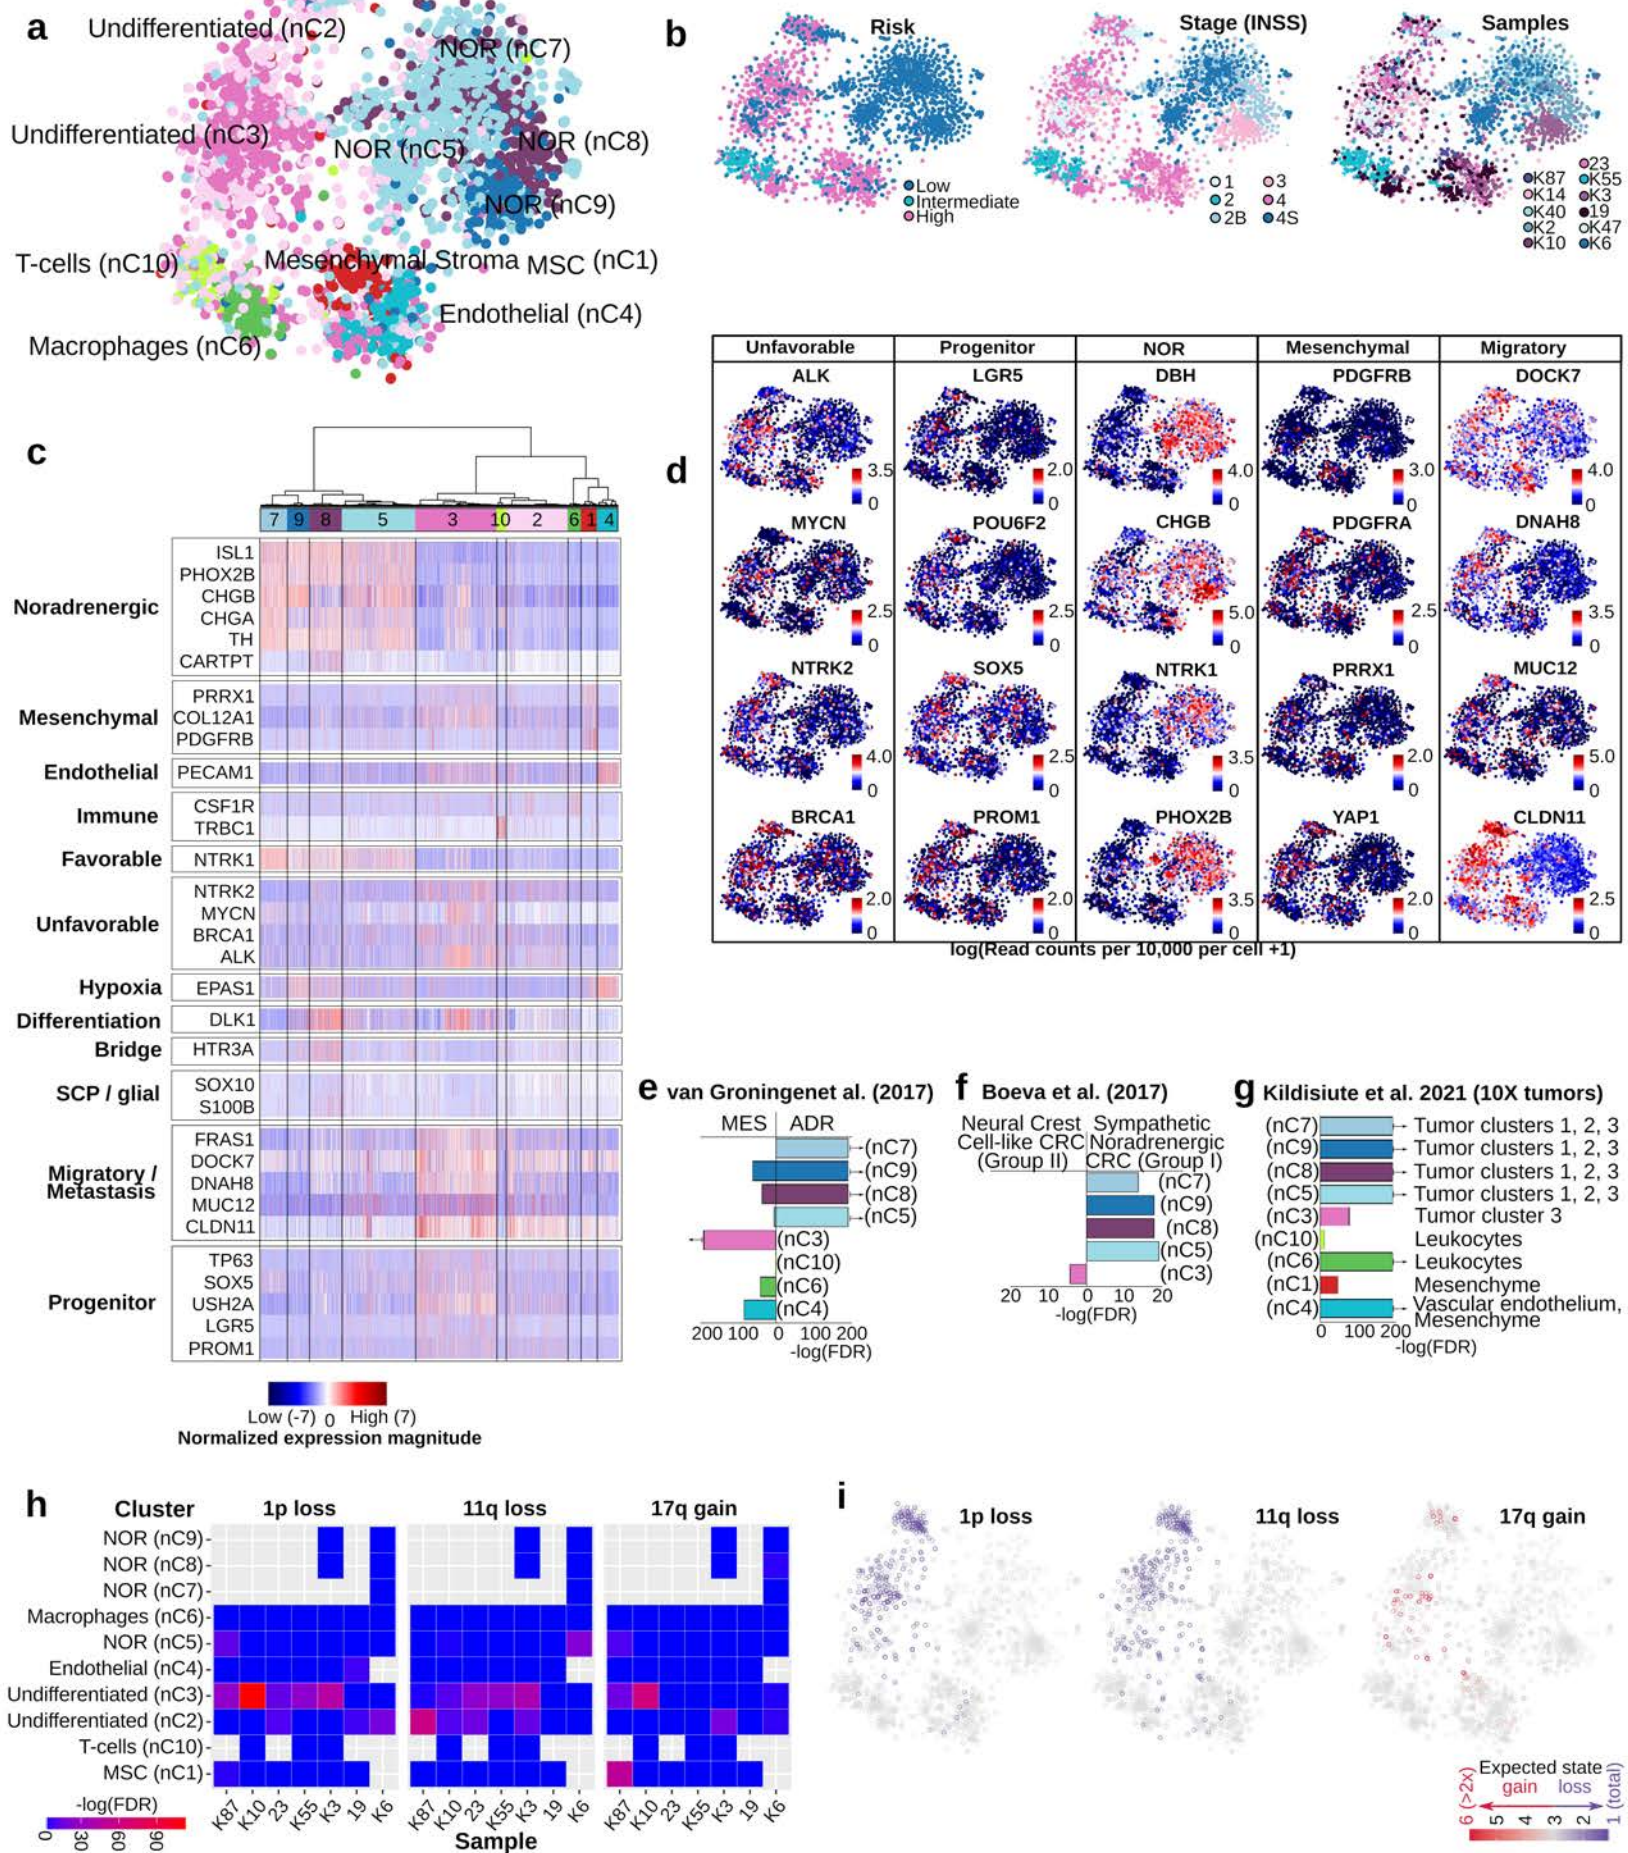

Figure 4

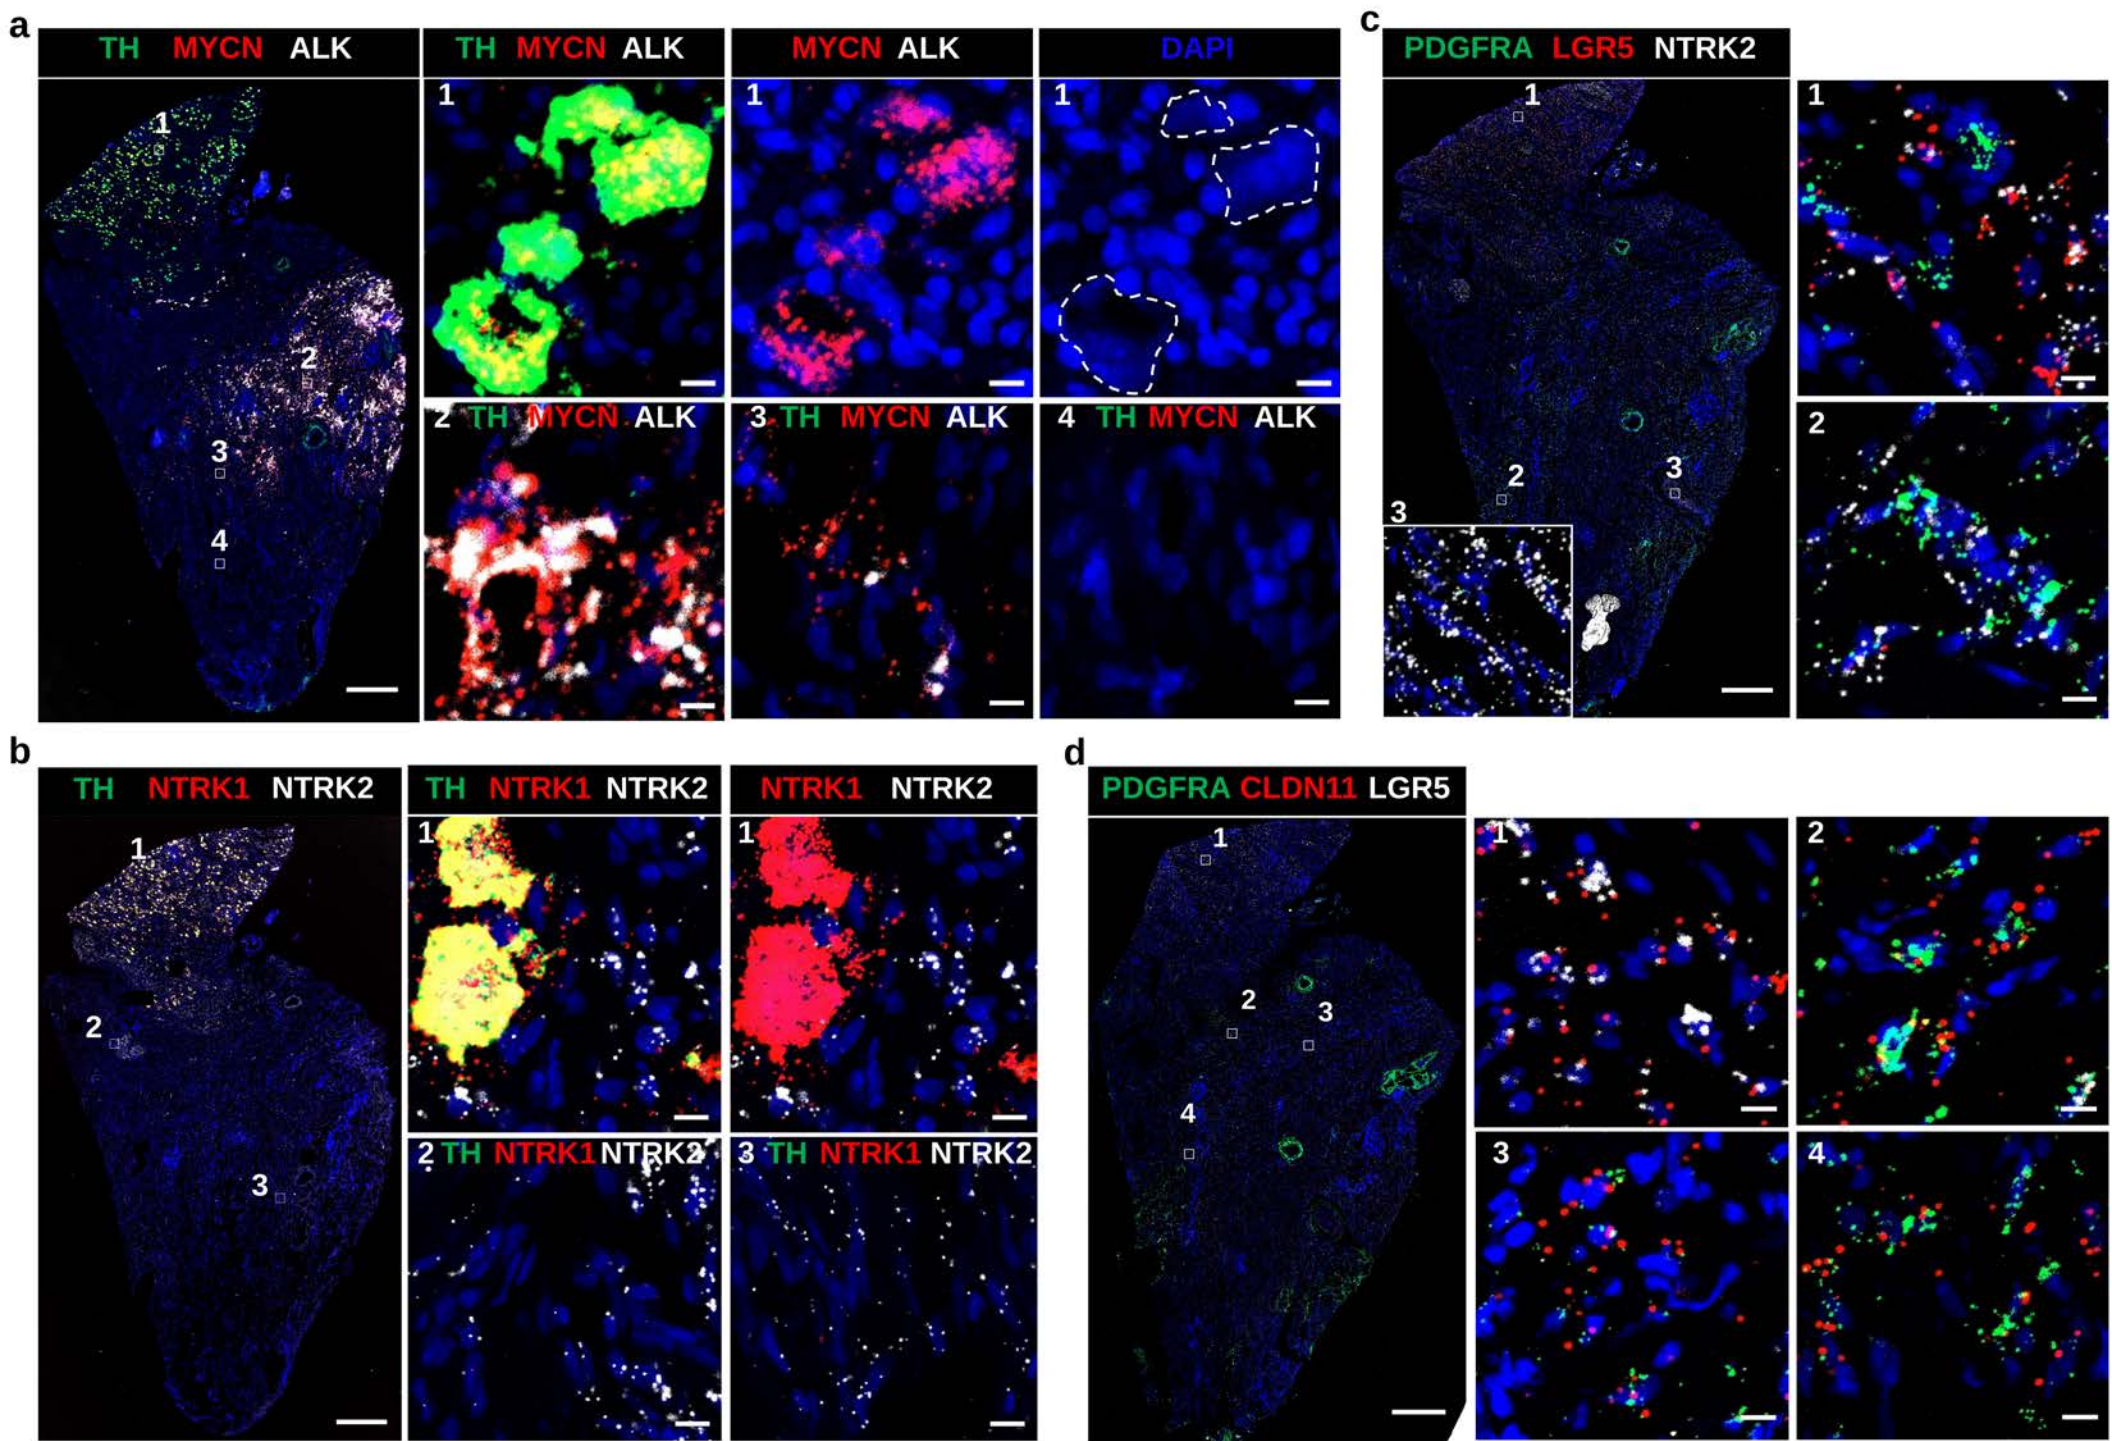

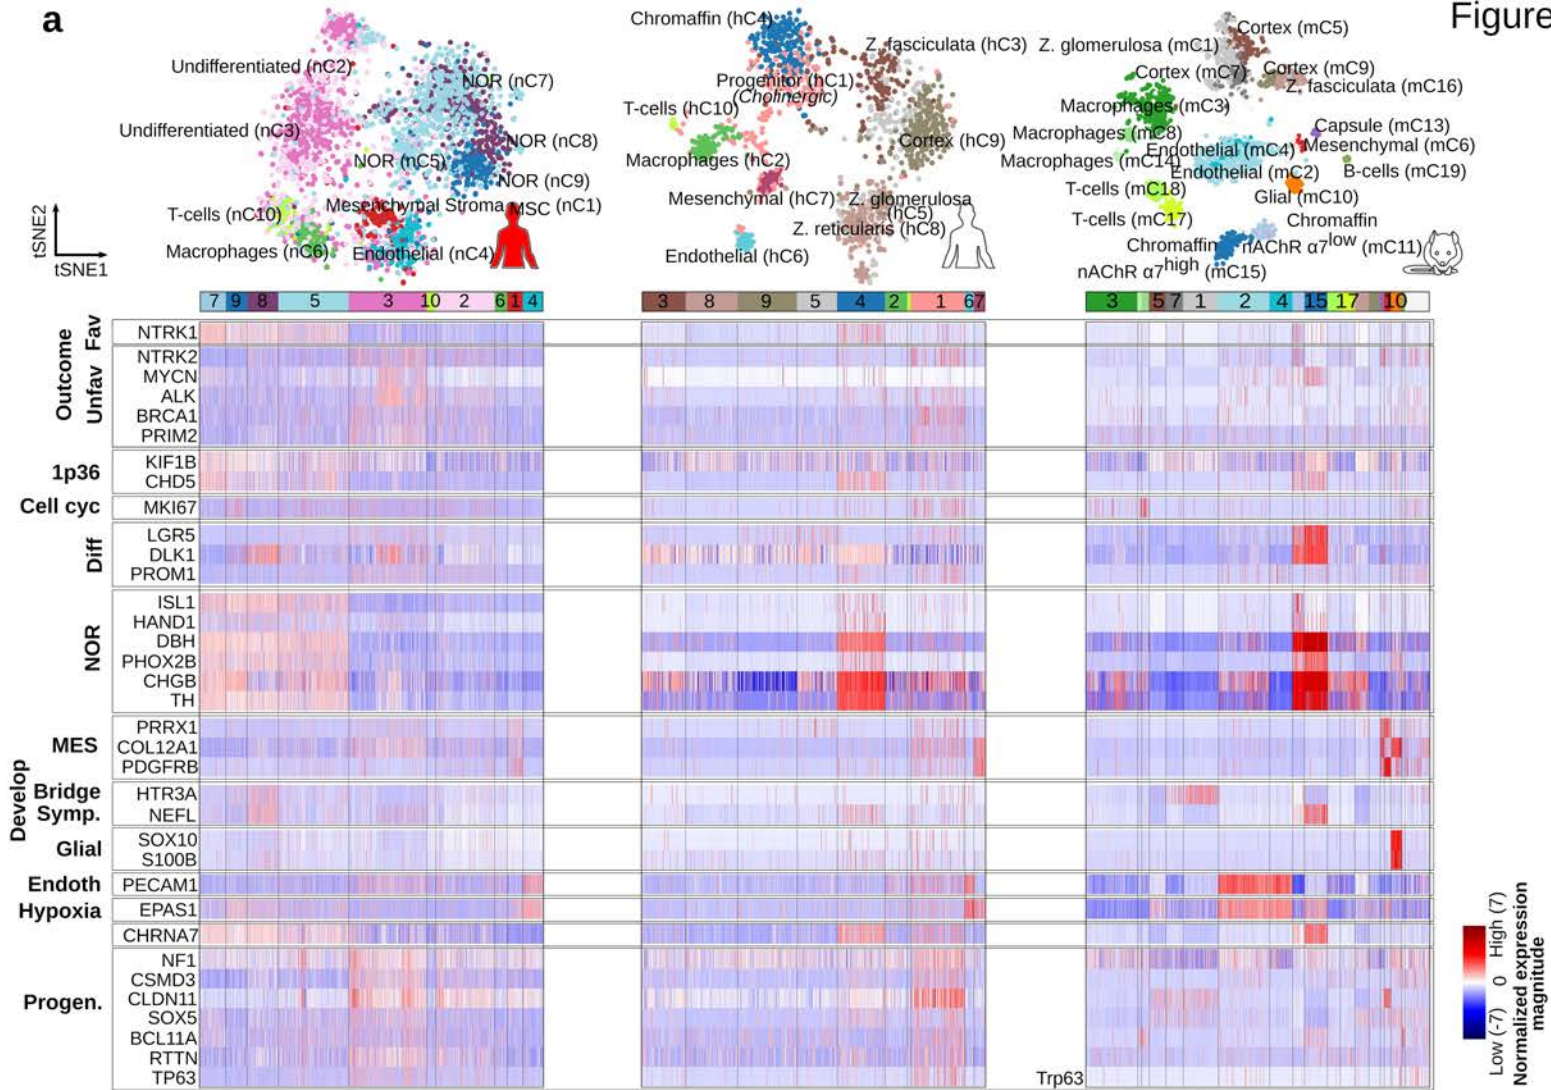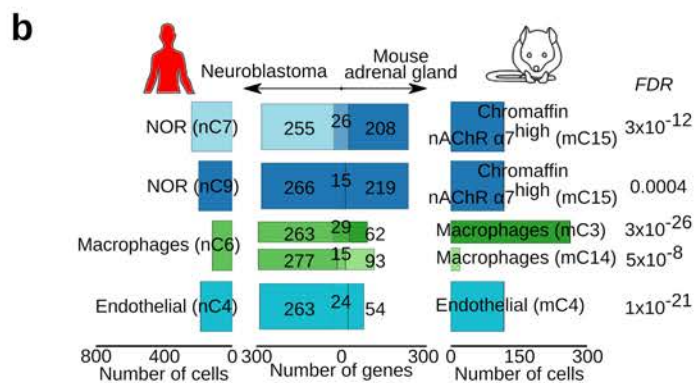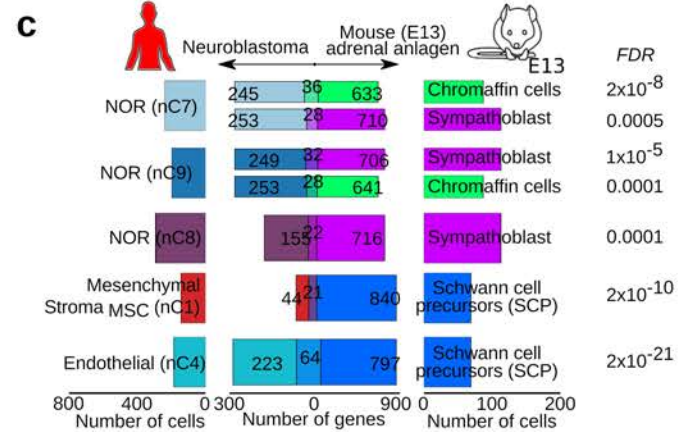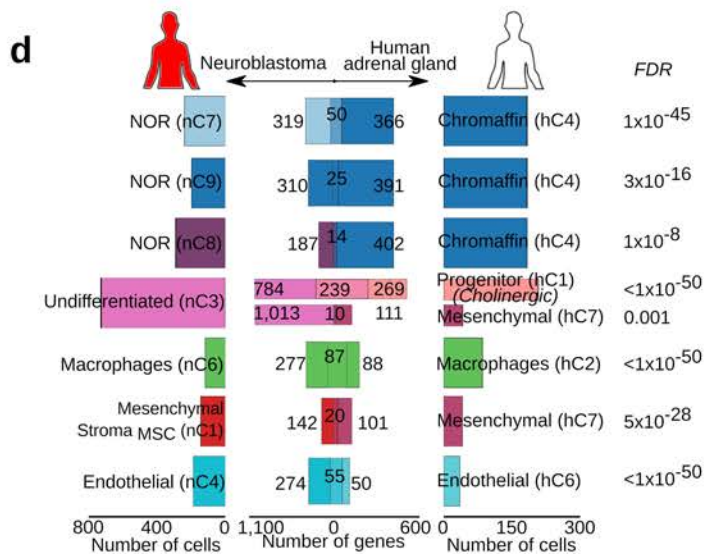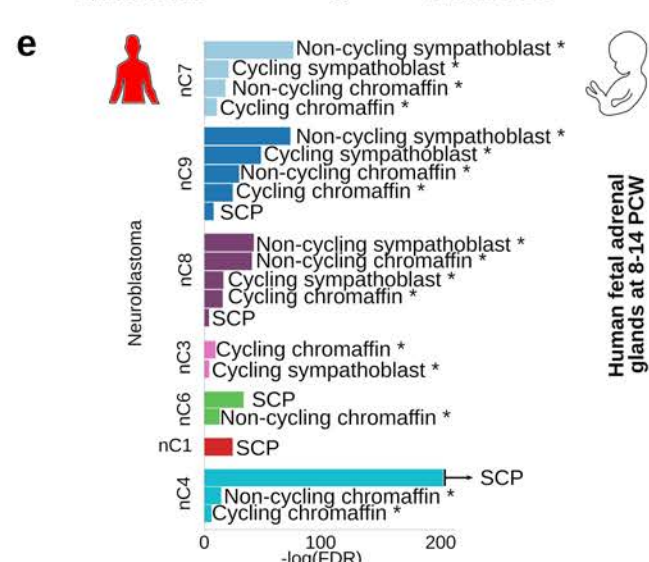

**Figure 6**

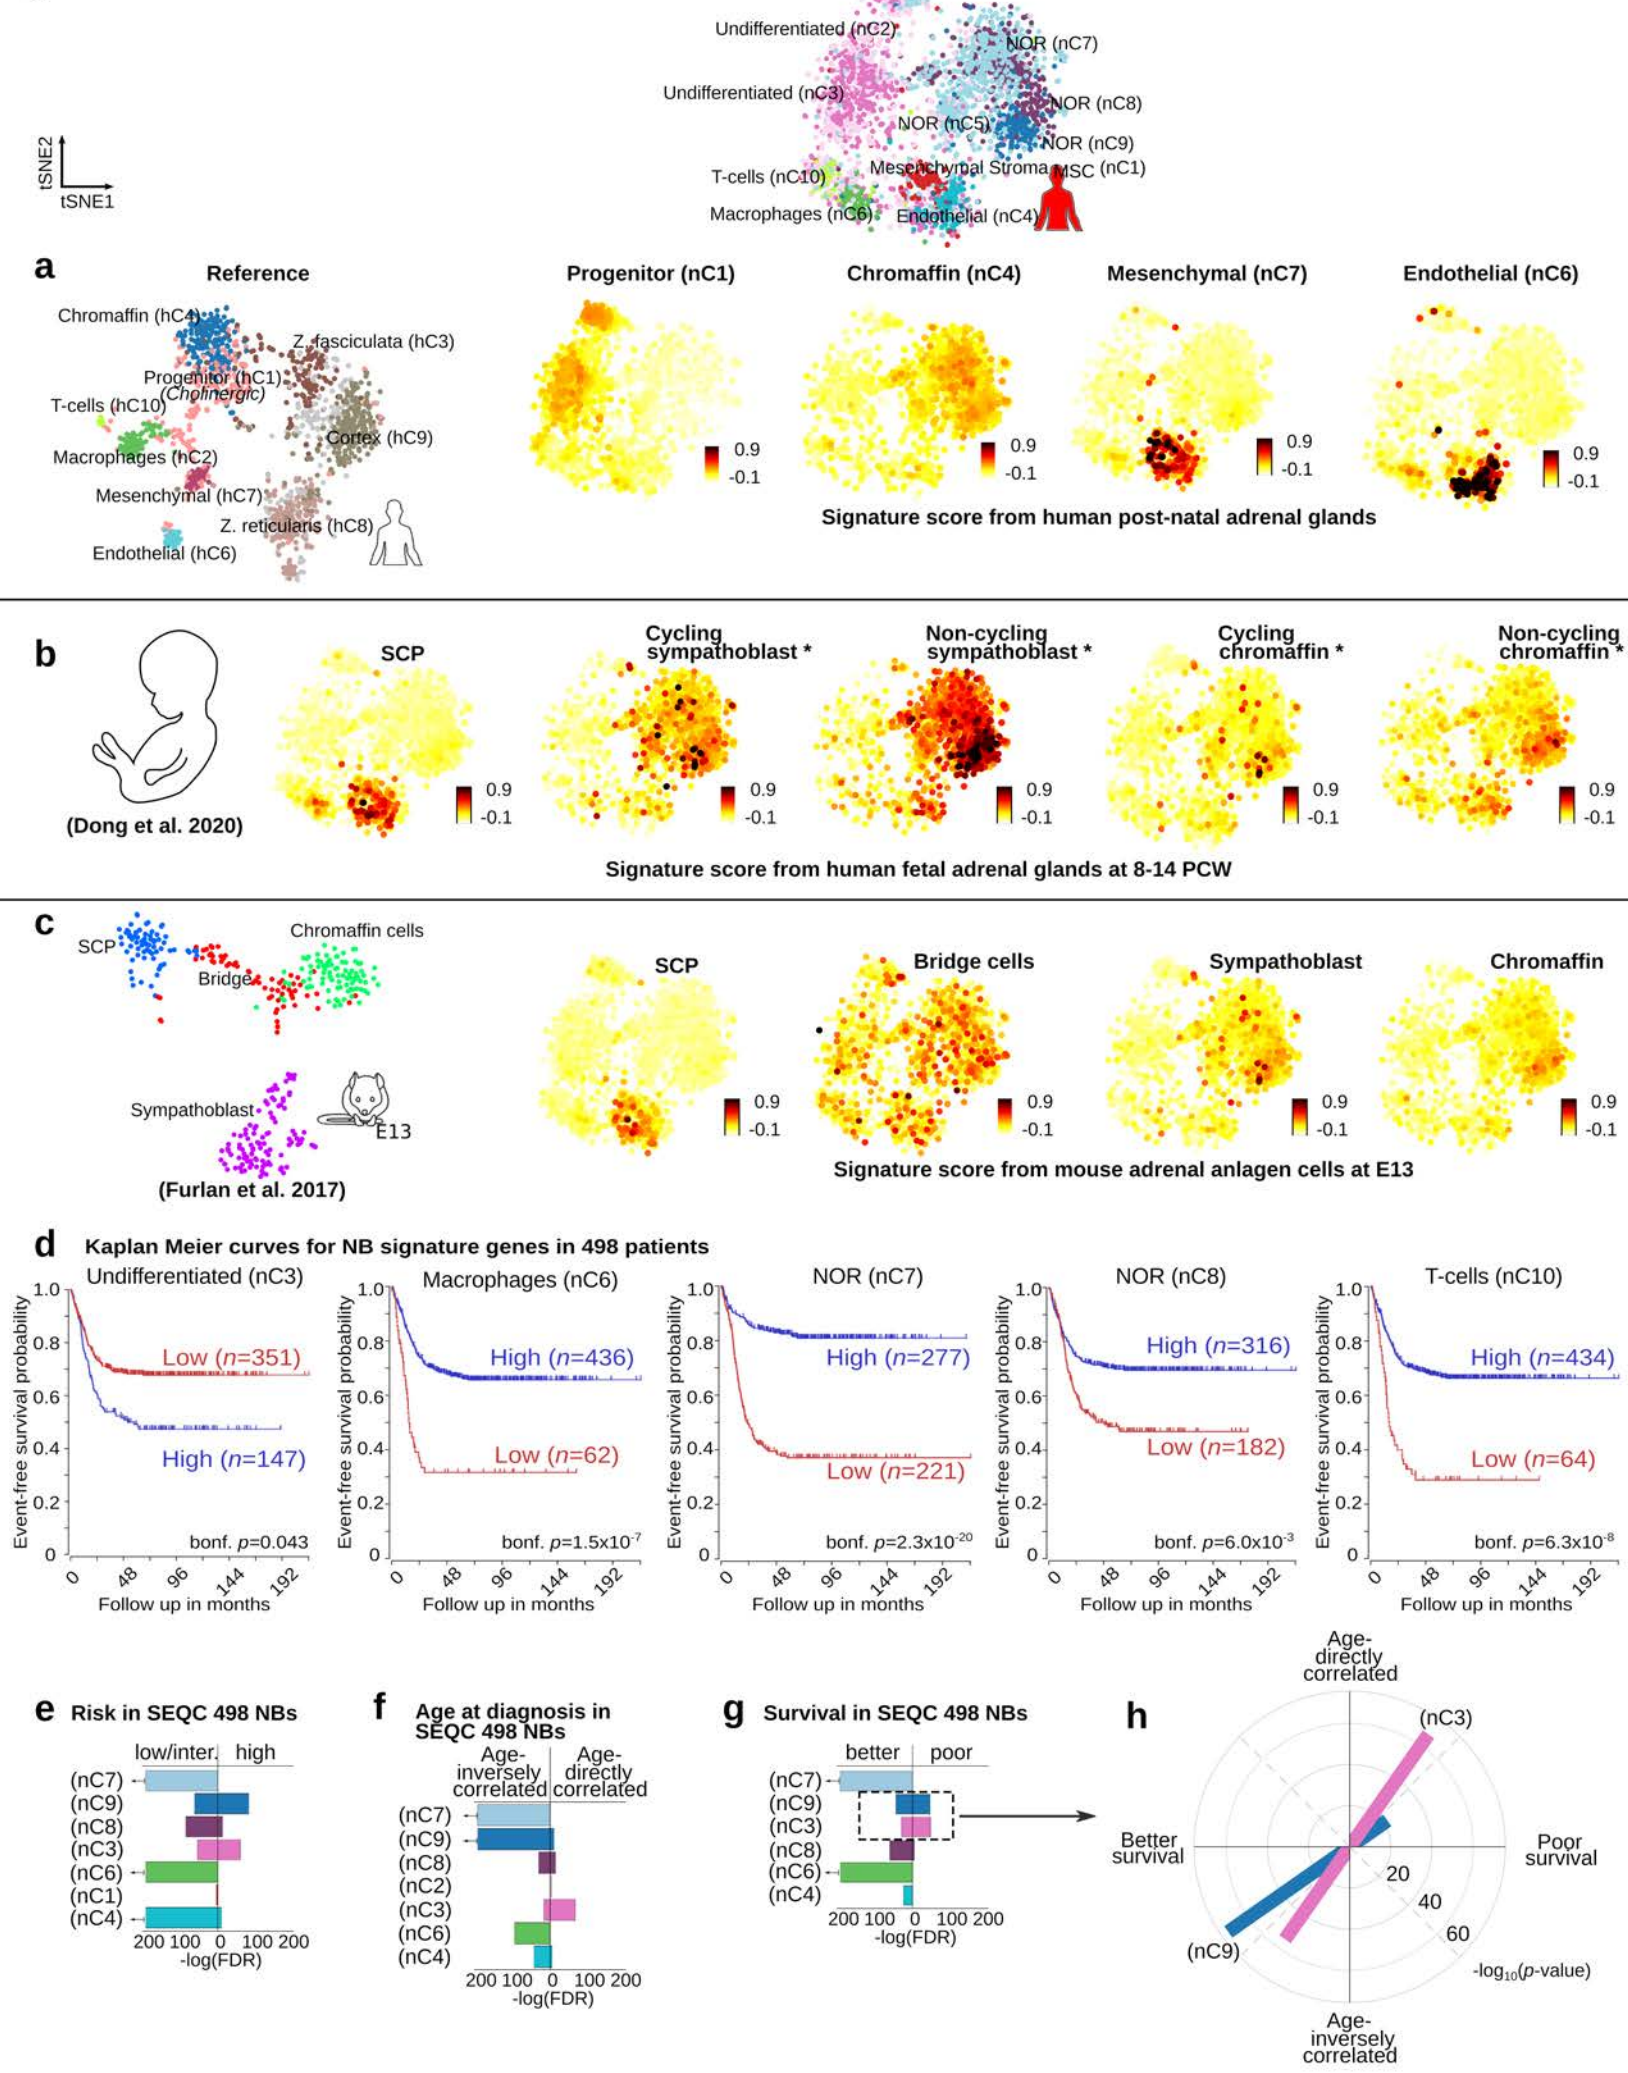

Figure 7

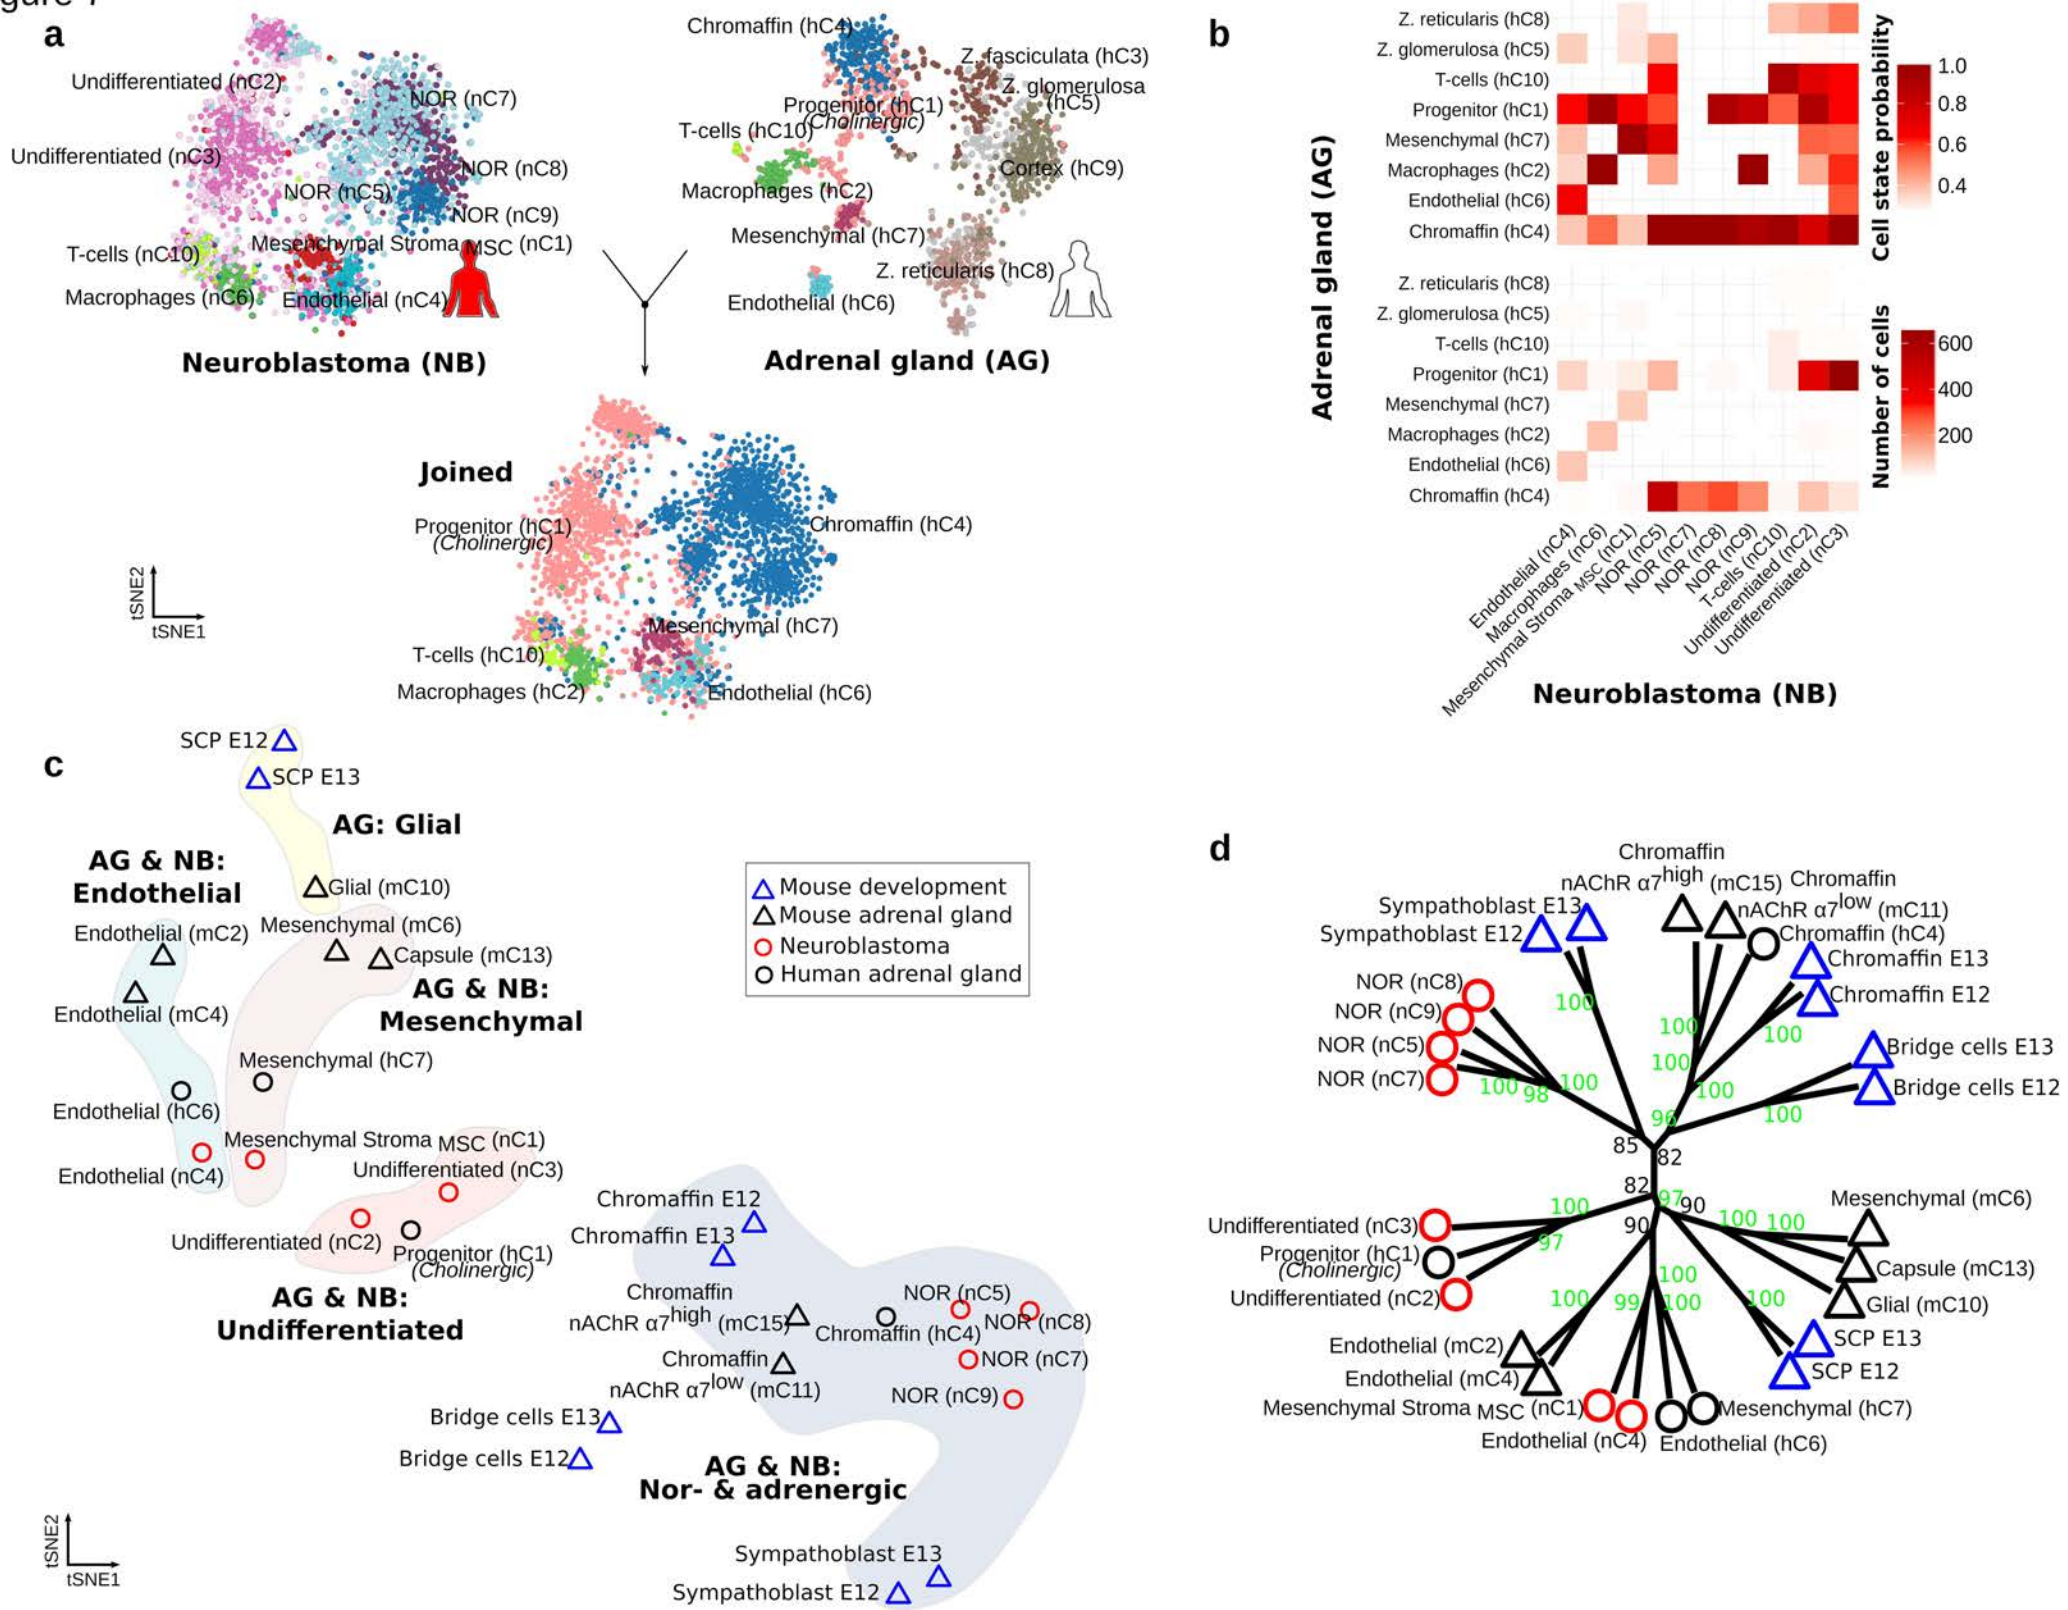

Source: https://biorxiv.org/content/10.1101/2021.03.26.437162v1.full.pdf
